# Supplementary material for: Chemo- and regioselective cross-dehydrogenative coupling reaction of 3-hydroxycarbazoles with arenols catalyzed by a mesoporous silica-supported oxovanadium
Source: Royal Society of Chemistry journal article supplement (doi:10.1039/d1ra07723f), 2021-01-01
Supplement: d1ra07723f1.pdf [file d1ra07723f1.pdf]

## *Supporting Information*

# Chemo- and regioselective cross-dehydrogenative coupling reaction of 3-hydroxycarbazoles with arenols catalyzed by a mesoporous silica-supported oxovanadium

Kengo Kasama<sup>a</sup>, Kyohei Kanomata<sup>a</sup>, Yuya Hinami<sup>a</sup>, Karin Mizuno<sup>a</sup>, Yuta Uetake<sup>b,c</sup>, Toru Amaya<sup>d</sup>, Makoto Sako<sup>e</sup>, Shinobu Takizawa<sup>e</sup>, Hiroaki Sasai<sup>e</sup>, and Shuji Akai<sup>\*a</sup>

<sup>a</sup> Graduate School of Pharmaceutical Sciences, Osaka University, 1-6 Yamadaoka, Suita, Osaka 565-0871, Japan.

<sup>b</sup> Division of Applied Chemistry, Graduate School of Engineering, Osaka University, 2-1 Yamadaoka, Suita, Osaka 565-0871, Japan.

<sup>c</sup> Innovative Catalysis Science Division, Institute for Open and Transdisciplinary Research Initiatives (ICS-OTRI), Osaka University, 2-1 Yamadaoka, Suita, Osaka 565-0871, Japan.

<sup>d</sup> Graduate School of Science, Nagoya City University, Nagoya 467-8501, Japan.

<sup>e</sup> SANKEN (The Institute of Scientific and Industrial Research), Osaka University, Mihogaoka, Ibaraki, Osaka 567-0047, Japan.

E-mail: akai@phs.osaka-u.ac.jp.

|                                                                 |     |
|-----------------------------------------------------------------|-----|
| <b>1. General information</b> .....                             | S2  |
| <b>2. Screening of reaction conditions</b> .....                | S3  |
| <b>3. Substrate syntheses</b> .....                             | S4  |
| <b>3-1. Synthesis of hydroxycarbazoles 1</b> .....              | S4  |
| <b>3-2. Synthesis of naphthols 2</b> .....                      | S6  |
| <b>4. Investigation of reaction mechanism</b> .....             | S7  |
| <b>4-1. Radical trap experiment</b> .....                       | S7  |
| <b>4-2. ESR analysis</b> .....                                  | S7  |
| <b>4-3. XANES analysis</b> .....                                | S8  |
| <b>5. Leaching examination of V-MPS4</b> .....                  | S8  |
| <b>6. Determination of the vanadium content of V-MPS4</b> ..... | S9  |
| <b>7. References</b> .....                                      | S10 |
| <b>8. NMR spectra</b> .....                                     | S11 |

## 1. General information

All reactions were monitored by thin-layer chromatography (TLC) on glass-backed silica gel 60 F254, 0.2 mm plates (Merck), and compounds were visualized under UV light (254 nm). All new products were fully characterized by  $^1\text{H}$  and  $^{13}\text{C}$  NMR spectra, infrared (IR) absorption spectrum, and high-resolution mass spectrum (HRMS). IR spectra were recorded on a SHIMADZU IRAffinity-1S spectrophotometer.  $^1\text{H}$  and  $^{13}\text{C}$  NMR spectra were measured on a JEOL JNM-ECA500 ( $^1\text{H}$ : 500 MHz,  $^{13}\text{C}$ : 125 MHz) instrument. Chemical shifts were reported in  $\delta$  (ppm) relative to tetramethylsilane (0.00 ppm) or the residual nondeuterated solvent signal for  $^1\text{H}$  ( $\text{CDCl}_3$ :  $\delta = 7.26$  ppm, acetone- $d_6$ :  $\delta = 2.05$  ppm) and relative to the solvent signal for  $^{13}\text{C}$  ( $\text{CDCl}_3$ :  $\delta = 77.00$  ppm, acetone- $d_6$ :  $\delta = 29.84$  ppm). High-resolution mass spectra (HRMS) were measured on a JEOL JMS-S3000 (MALDI) with a TOF mass analyzer. Vanadium content was measured by inductively coupled plasma-atomic emission spectrometry (ICP-AES, Agilent 720 ICP) analysis. Electron spin resonance (ESR) spectra were recorded on a Bruker EMXmicro instrument (modulation amplitude: 1.0 G, modulation frequency: 100.0 KHz, conversion: 30.00 ms, time constant: 10.2 ms).

All reagents and solvents were purchased from FUJIFILM Wako Pure Chemical, Tokyo Chemical Industry, Sigma-Aldrich, Nacalai Tesque, Kishida Chemical, Chem Impex International, Oakwood Products and Combi Blocks, and used without further purification. Flash chromatography was performed on silica gel 60N (particle size 40–50  $\mu\text{m}$ ) purchased from Kanto Chemical Co., Inc. Mesoporous silica (TMPS-4R) was kindly supplied by Taiyo Kagaku Co., Ltd. (Tokyo, Japan).

## 2. Screening of reaction conditions

**Table S1.** Screening of reoxidants.

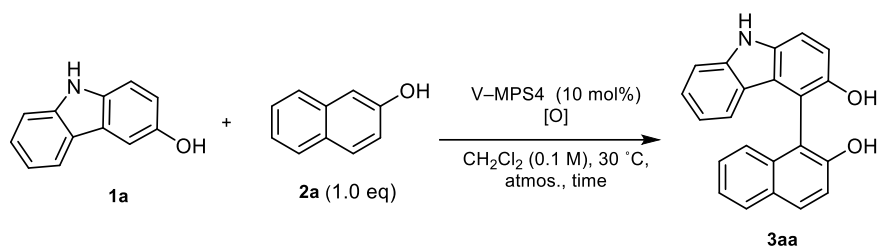

| entry | [O] (eq.)                     | atmos.         | time | yield of <b>3aa</b> |
|-------|-------------------------------|----------------|------|---------------------|
| 1     | none                          | O <sub>2</sub> | 4 h  | 83%                 |
| 2     | Oxone (2.0)                   | Ar             | 6 h  | 15%                 |
| 3     | mCPBA (2.0)                   | Ar             | 6 h  | trace               |
| 4     | NMO (2.0)                     | Ar             | 6 h  | 10%                 |
| 5     | NaClO·5H <sub>2</sub> O (2.0) | Ar             | 6 h  | 11%                 |

The yields were determined by <sup>1</sup>H NMR analysis of the crude reaction mixture using 1,1,2,2-tetrachloroethane as an internal standard. mCPBA = *m*-chloroperoxybenzoic acid, NMO = 4-methylmorpholine,

**Table S2.** Screening of solvents and vanadium catalysts.

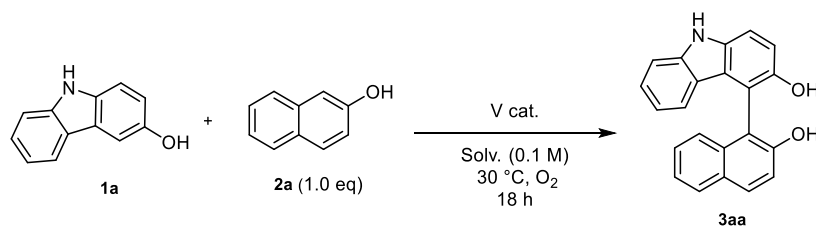

| Entry                            | V cat. (mol%)                             | Solv.                           | Yield of <b>3aa</b>    |
|----------------------------------|-------------------------------------------|---------------------------------|------------------------|
| 1                                | V-MPS4 (10)                               | MeOH                            | trace                  |
| 2                                | V-MPS4 (10)                               | THF                             | trace                  |
| 3                                | V-MPS4 (10)                               | DME                             | 6%                     |
| 4                                | V-MPS4 (10)                               | acetone                         | 15%                    |
| 5                                | V-MPS4 (10)                               | TBME                            | 16%                    |
| 6                                | V-MPS4 (10)                               | CPME                            | 20%                    |
| 7                                | V-MPS4 (10)                               | MeCN                            | 26%                    |
| 8                                | V-MPS4 (10)                               | CCl <sub>4</sub>                | 60%                    |
| 9                                | V-MPS4 (10)                               | CHCl <sub>3</sub>               | 85%                    |
| 10                               | V-MPS4 (10)                               | toluene                         | 86%                    |
| 11                               | V <sub>2</sub> O <sub>5</sub> (5)         | CH <sub>2</sub> Cl <sub>2</sub> | no reaction            |
| 12                               | VOSO <sub>4</sub> ·nH <sub>2</sub> O (10) | CH <sub>2</sub> Cl <sub>2</sub> | no reaction            |
| 13 <sup>b</sup>                  | V-MPS4 (4)                                | CH <sub>2</sub> Cl <sub>2</sub> | 48%                    |
| Table 1, <sup>b</sup><br>Entry 1 | V-MPS4 (10)                               | CH <sub>2</sub> Cl <sub>2</sub> | 87% (93%) <sup>b</sup> |

<sup>a</sup> The yields were determined by <sup>1</sup>H NMR analysis of the crude reaction mixture using 1,1,2,2-tetrachloroethane as an internal standard. <sup>b</sup> Reaction time was 12 h. <sup>c</sup> Isolated yield. THF = tetrahydrofuran, DME = 1,2-dimethoxyethane, TBME = *tert*-butyl methyl ether, CPME = cyclopentyl methyl ether.

### 3. Substrate syntheses

#### 3-1. Synthesis of hydroxycarbazoles **1**

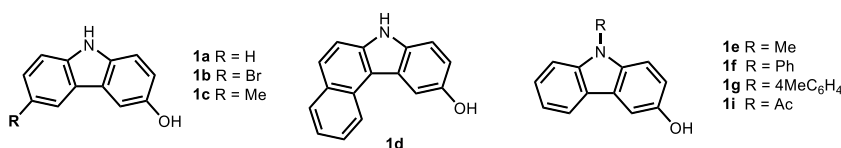

Compounds **1a–1d** were synthesized as described below. Compounds **1e–1i** were prepared according to the literature procedure.<sup>1–3</sup>

#### 3-Methoxy-9H-carbazole (**S2**)

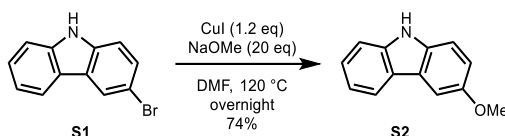

3-Bromo-9H-carbazole **S1** (9.8 g, 40 mmol) and CuI (9.1 g, 48 mmol) were dissolved in dry DMF (80 mL, 0.5 M) under Ar. A 5 M solution of NaOMe in MeOH (160 mL, 0.80 mol) was added at room temperature and the solution was stirred at 120 °C overnight. After cooling to room temperature, the solution was evaporated and then the residue was extracted with EtOAc two times. The combined organic layers were dried over anhydrous Na<sub>2</sub>SO<sub>4</sub>, filtered, and evaporated in vacuo. The crude product was purified by silica gel chromatography (hexane/CH<sub>2</sub>Cl<sub>2</sub> = 1:1) to give **S2** (3.64 g, 92% yield). Its <sup>1</sup>H NMR data were in good agreement with those reported in the literature.<sup>4</sup>

#### 3-Hydroxycarbazole (**1a**) [General procedure for *O*-demethylation]

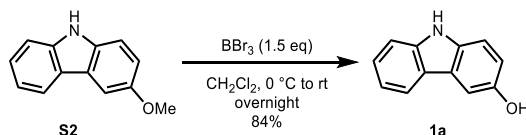

BBr<sub>3</sub> (1.0 M in CH<sub>2</sub>Cl<sub>2</sub>, 4.5 mL, 4.5 mmol) was added to a solution of **S2** (592 mg, 3.0 mmol) in dry CH<sub>2</sub>Cl<sub>2</sub> (30 mL) at 0 °C. The mixture was stirred overnight at room temperature. After cooling to 0 °C, the reaction was quenched with sat. NaHCO<sub>3</sub>. The aqueous layer was extracted with EtOAc three times. The combined organic layers were dried over anhydrous Na<sub>2</sub>SO<sub>4</sub>, filtered, and evaporated under vacuo. The crude product was purified by silica gel column chromatography (hexane/EtOAc = 2:1) to give **1a** in (462 mg, 84% yield) as a colorless solid. Its <sup>1</sup>H NMR data were in good agreement with those reported in the literature.<sup>1</sup>

#### 6-Bromo-9H-carbazol-3-ol (**1b**)

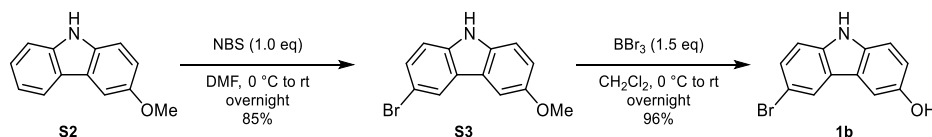

Compound **S3** was prepared according to the literature.<sup>5</sup> A solution of *N*-bromosuccinimide (NBS) (890 mg, 5.0 mmol) in DMF (5 mL) was slowly added into a solution of **S2** (986 mg, 5.0 mmol) in DMF (5 mL) at 0 °C. The

resultant mixture was stirred overnight at room temperature. After complete consumption of **S2** was confirmed by TLC analysis, water was added and the mixture was filtered by using a Kiriya funnel (H<sub>2</sub>O). Then, the solid product left in the funnel was washed with water and recrystallized from EtOH to give **S3** (1.17 g, 85% yield). Its <sup>1</sup>H NMR data were in good agreement with those reported in the literature.<sup>5</sup> Deprotection of **S3** (690 mg, 2.5 mmol) was conducted according to the general *O*-demethylation procedure of **1a** to give **1b** (630 mg, 96% yield). Its <sup>1</sup>H NMR data were in good agreement with those reported in the literature.<sup>6</sup>

#### 6-Methyl-9*H*-carbazol-3-ol (**1c**)

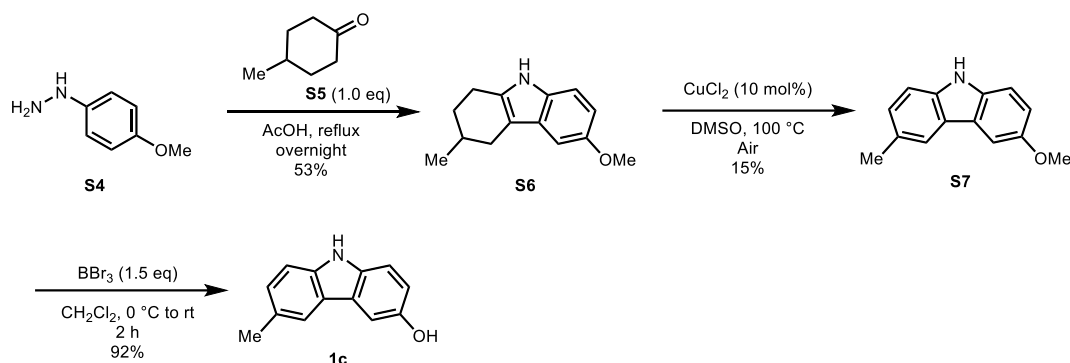

Compound **S6** (1.3 g, 53% yield) was prepared according to the literature<sup>7</sup> using **S4** (2.0 g, 11.5 mmol) and **S5** (1.4 mL, 11.5 mmol). Compound **S7** (159 mg, 15% yield) was prepared according to the literature<sup>8</sup> using **S6** (1.08 g, 5.0 mmol). Deprotection of **S7** (200 mg, 0.94 mmol) was conducted according to the general *O*-demethylation procedure of **1a** to give **1c** (171 mg, 92% yield). Its <sup>1</sup>H NMR data were in good agreement with those reported in the literature.<sup>9</sup>

#### 7*H*-benzo[*c*]carbazol-10-ol (**1d**)

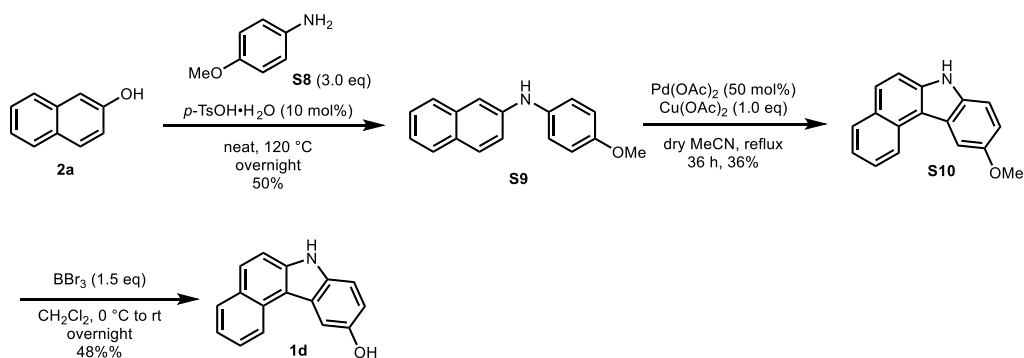

Compound **S9** was prepared from **2a** (1.44 g, 10.0 mmol) according to the literature<sup>10</sup> with a modification. A mixture of **S9** (230 mg, 0.92 mmol), Pd(OAc)<sub>2</sub> (104 mg, 0.46 mmol), and Cu(OAc)<sub>2</sub> (167 mg, 0.92 mmol) in dry MeCN (2.8 mL) was refluxed for 36 h. After cooling to room temperature, the reaction mixture was filtered through a pad of silica gel (hexane/EtOAc = 1:1) and the filtrate was concentrated in vacuo. The crude product was purified by silica gel column chromatography (hexane/ EtOAc = 9:1) to give **S10** (81 mg, 36% yield). Deprotection of **S10** (247 mg, 1.0 mmol) was conducted according to the general *O*-demethylation procedure of **1a**, and the crude product

was recrystallized from  $\text{CHCl}_3$  to give **1d** (111 mg, 48% yield). Its  $^1\text{H}$  NMR data were in good agreement with those reported in the literature.<sup>6</sup>

### 3-2. Synthesis of naphthols **2**

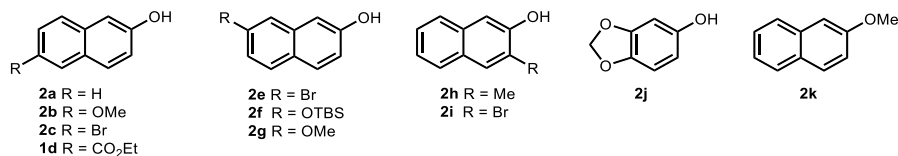

Compounds **2a-2c**, **2e**, **2g**, **2h**, **2j**, and **2k** were purchased from commercial suppliers. Compound **2f** was prepared according to the literature procedure.<sup>11</sup> Compounds **2d** and **2h** were synthesized as described below.

#### Ethyl 6-hydroxy-2-naphthoate (**2d**)

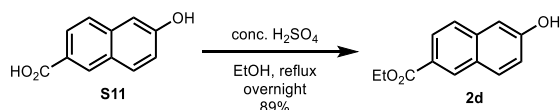

To a solution of 6-hydroxy-2-naphthoic acid **S11** (1.88 g, 10.0 mmol) in EtOH (50 mL) was added conc.  $\text{H}_2\text{SO}_4$  (5 mL) at room temperature. The mixture was refluxed overnight and then cooled to room temperature. The solution was evaporated in vacuo and sat.  $\text{NaHCO}_3$  was added to the residue. The mixture was extracted with EtOAc three times. The combined organic layers were dried over anhydrous  $\text{Na}_2\text{SO}_4$ , filtered, and evaporated in vacuo to give **2d** (1.92g, 89% yield). Its  $^1\text{H}$  NMR data were in good agreement with those reported in the literature.<sup>12</sup> As-prepared **2d** was used without further purification.

#### 3-Methylnaphthalen-2-ol (**2h**)

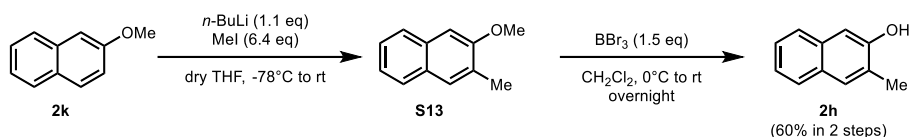

2-Methoxy-3-methylnaphthalene **S13** was prepared according to the literature procedure.<sup>13</sup> Deprotection of **S13** was conducted according to the general *O*-demethylation procedure of **1a**, and the crude product was recrystallized from  $\text{CHCl}_3$ /hexane to give **2h** (475 mg, 60% yield in two steps). Its  $^1\text{H}$  NMR data were in good agreement with those reported in the literature.<sup>14</sup>

## 4. Investigation of reaction mechanism

### 4-1. Radical trap experiment

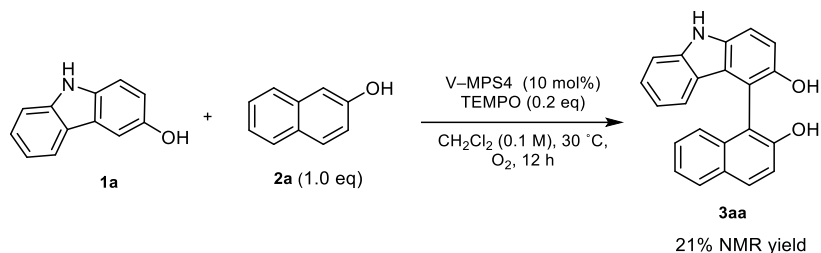

**Scheme S1.** The addition of TEMPO as a radical scavenger.

### 4-2. ESR analysis

**[Sample preparation (Figure 1a)]** A Schlenk tube was charged with **1a** (18.3 mg, 0.10 mmol), **2a** (14.4 mg, 0.10 mmol), and V-MPS4 (10 mol% based on vanadium content) and the tube was purged with nitrogen. After that, CH<sub>2</sub>Cl<sub>2</sub> (1.0 mL, 0.1 M) was added to the tube and then the mixture was stirred at 30 °C for 12 h under nitrogen atmosphere. The solvent was evaporated in vacuo at room temperature, and nitrogen was purged to the tube. The residue was transferred to an ESR sample tube under a nitrogen atmosphere.

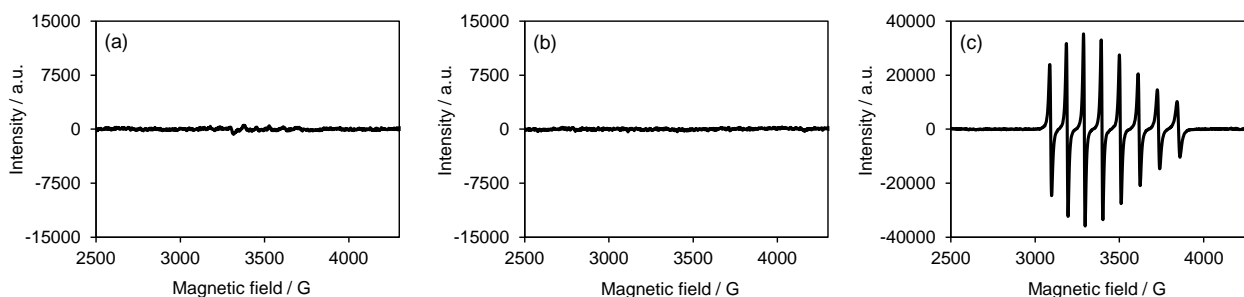

**Figure S1.** ESR spectra of (a) V-MPS4 before the reaction (solid state), (b) VO(OSiPh<sub>3</sub>)<sub>3</sub> in toluene, and (c) VO(acac)<sub>2</sub> in toluene.

### 4-3. XANES analysis

X-ray absorption spectroscopy (XAS) experiments were performed at SPring-8 BL14B2 beamline using Si(111) double-crystal monochromatized synchrotron radiation. All XAS experiments were carried out using transmission mode with quick scan technique (QXAFS). Ionization chambers were used to measure the intensities of the incident ( $I_0$ ) and transmitted ( $I$ ) X-ray.  $E_0$  value was defined as a fraction of the edge step of the normalized  $\mu(E)$  spectrum, and that of V foil was set to 5465 eV for photon energy calibration. XAS analyses were conducted using Demeter package, a comprehensive system for processing and analysing X-ray absorption spectroscopy data.<sup>15-17</sup> Background removal by cubic spline method and normalization of raw data were performed using Athena software.

**[Sample preparation]** A mixture of a reagent and an appropriate amount of boron nitride (approx. 70–100 mg) were ground using an agate mortar over 45 min under ambient atmosphere. The resulting powder was pelletized using a tablet press (JASCO Corporation,  $\phi = 10$  mm) with the pressure ranging between 10 and 15 MPa. The thus-prepared pellets were packed in a gas barrier bag (thickness: 60  $\mu\text{m}$ ), and subjected to XAS measurement.

### 5. Leaching examination of V-MPS4

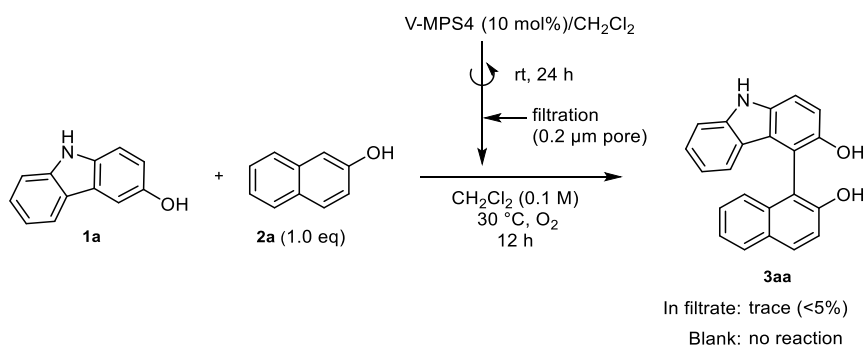

**Scheme S2.** Leaching examination of V-MPS4 in the CDC reaction.



## **6. Determination of the vanadium content of V-MPS4**

To the V-MPS4 (ca. 20–30 mg) was added 60% nitric acid (2.0 mL), and the resultant mixture was stirred for 5 h at room temperature. Then, the mixture was diluted with distilled water in a 50-mL volumetric flask. After passing through a membrane filter (0.2- $\mu$ m pore), the filtrate was analyzed by ICP-AES to determine the vanadium content. The result was  $11.0 \pm 0.33$  mg-V/g-V-MPS4 ( $0.216 \pm 0.0065$  mmol/g).

## 7. References

- 1 M. Sako, A. Sugizaki and S. Takizawa, *Bioorg. Med. Chem.*, 2018, **28**, 2751–2753.
- 2 H. Kang, Y. E. Lee, P. V. G. Reddy, S. Dey, S. E. Allen, K. A. Niederer, P. Sung, K. Hewitt, C. Torruellas, M. R. Herling and M. C. Kozlowski, *Org. Lett.*, 2017, **19**, 5505–5508.
- 3 S. Xia, L. Gan, K. Wang, Z. Li and D. Ma, *J. Am. Chem. Soc.*, 2016, **138**, 13493–13496.
- 4 M. L. Louillat, A. Biafora, F. Legros and F. W. Patureau, *Angew. Chem. Int. Ed.*, 2014, **53**, 3505–3509.
- 5 M. Mao, M. G. Ren and Q. H. Song, *Chem. Eur. J.*, 2012, **18**, 15512–15522.
- 6 M. Sako, K. Higashida, G. T. Kamble, K. Kaut, A. Kumar, Y. Hirose, D. Zhou, T. Suzuki, M. Rueping, T. Maegawa, S. Takizawa and H. Sasai, *Org. Chem. Front.*, 2021, **8**, 4878–4885.
- 7 V. Humne, Y. Dangat, K. Vanka and P. Lokhande, *Org. Biomol. Chem.*, 2014, **12**, 4832–4836.
- 8 B. A. Dalvi and P. D. Lokhande, *Tetrahedron Lett.*, 2018, **59**, 2145–2149.
- 9 G. Karan, S. Sahu and M. S. Maji, *Chem. Commun.*, 2021, **57**, 5274–5277.
- 10 A. K. Mishra and S. Biswas, *J. Org. Chem.*, 2016, **81**, 2355–2363.
- 11 Y. F. Wong, Z. Wang and J. Sun, *Org. Biomol. Chem.*, 2016, **14**, 5751–5754.
- 12 K.-T. Lin, H.-M. Kuo, H.-S. Sheu and C. K. Lai, *Tetrahedron*, 2013, **69**, 9045–9055.
- 13 C. Zarate, M. Nakajima and R. Martin, *J. Am. Chem. Soc.*, 2017, **139**, 1191–1197.
- 14 W. Zhang and J. M. Ready, *Angew. Chem. Int. Ed.*, 2014, **53**, 8980–8984.
- 15 B. Ravel and M. Newville, *J. Synchrotron Radiat.*, 2005, **12**, 537–541.
- 16 M. Newville, *J. Synchrotron Radiat.*, 2001, **8**, 322–324.
- 17 J. J. Rehr and R. C. Albers, *Rev. Mod. Phys.*, 2000, **72**, 621–654.

## 8. NMR spectra

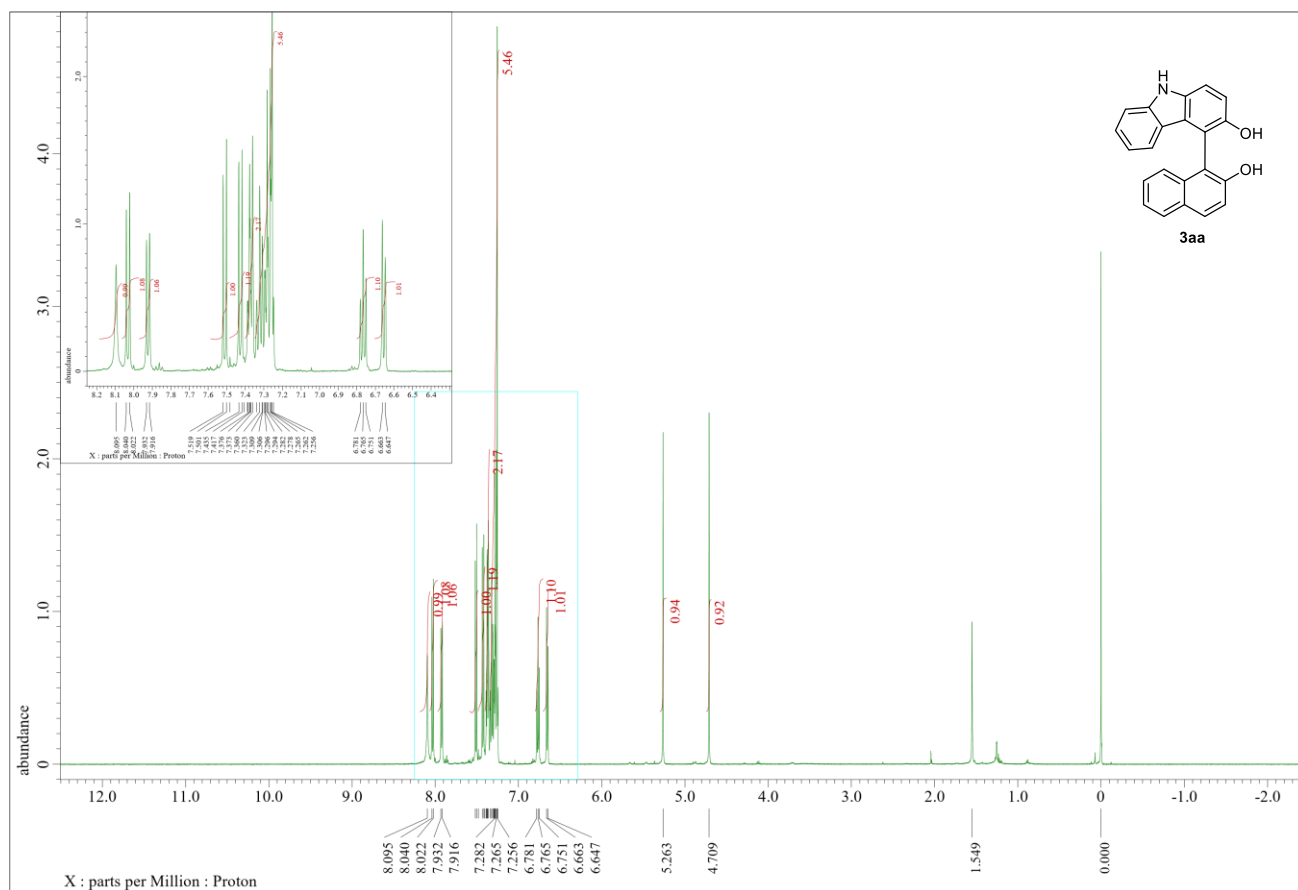

$^1\text{H}$  NMR spectrum (500 MHz,  $\text{CDCl}_3$ ) of **3aa**

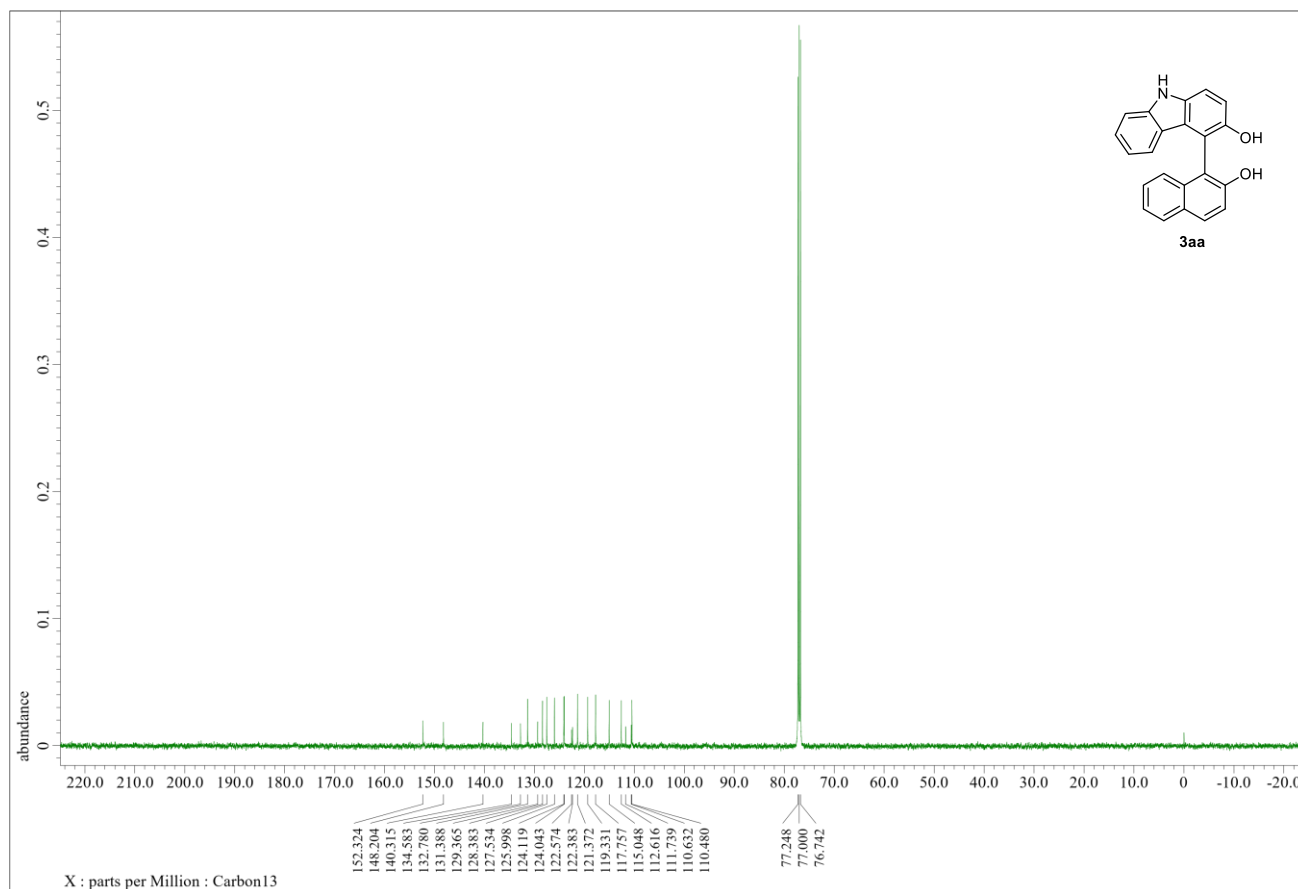

$^{13}\text{C}$  NMR spectrum (125 MHz,  $\text{CDCl}_3$ ) of **3aa**

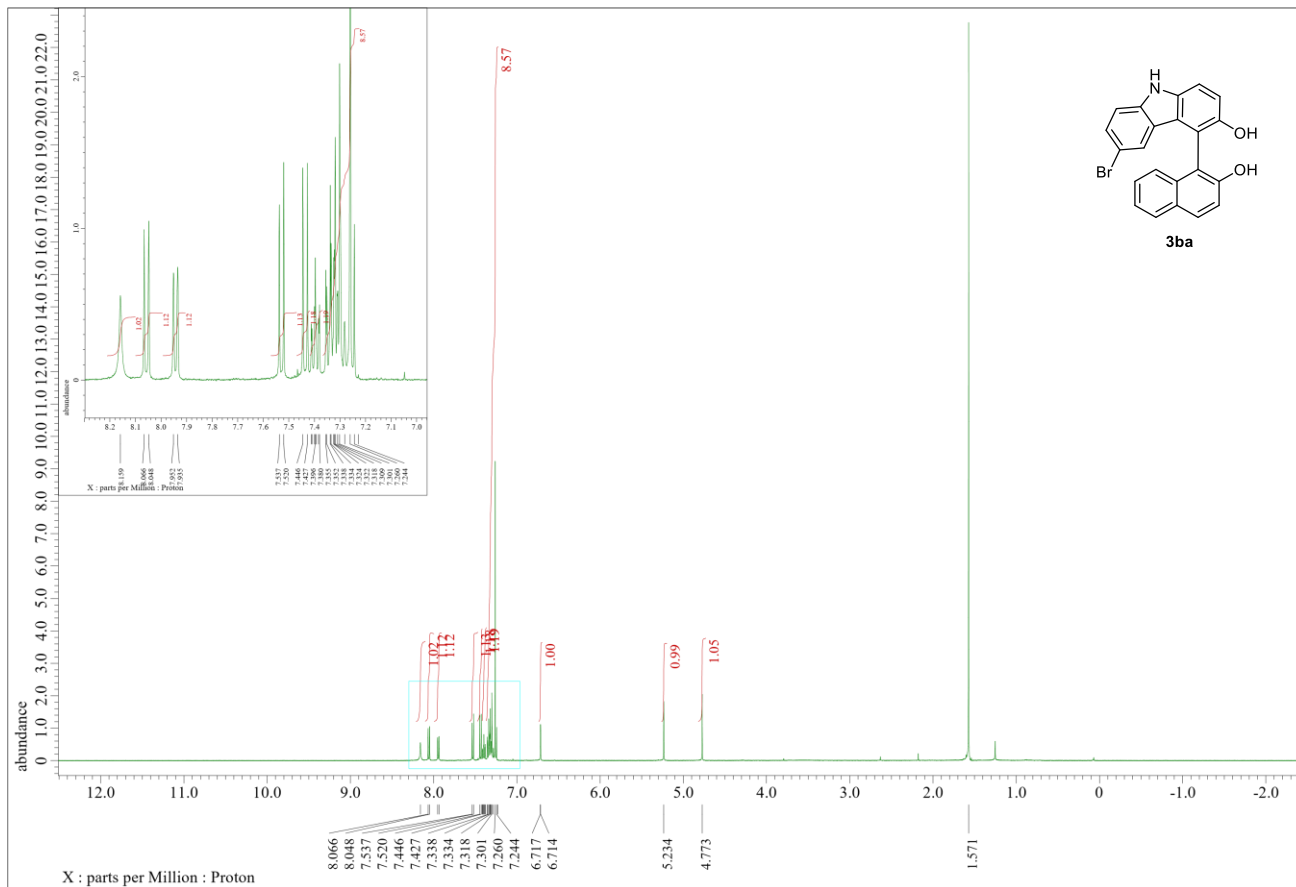

<sup>1</sup>H NMR spectrum (500 MHz, CDCl<sub>3</sub>) of 3ba

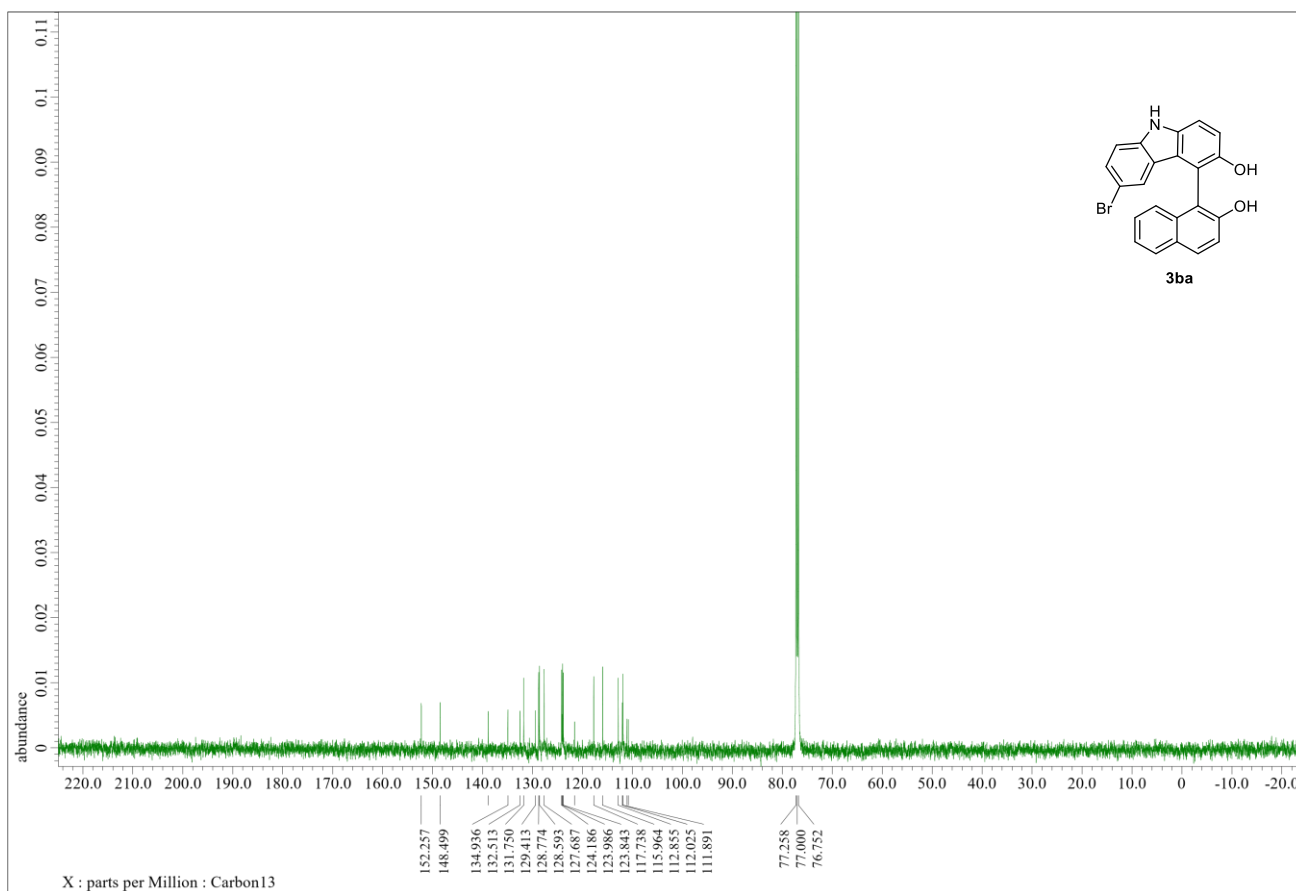

<sup>13</sup>C NMR spectrum (125 MHz, CDCl<sub>3</sub>) of 3ba

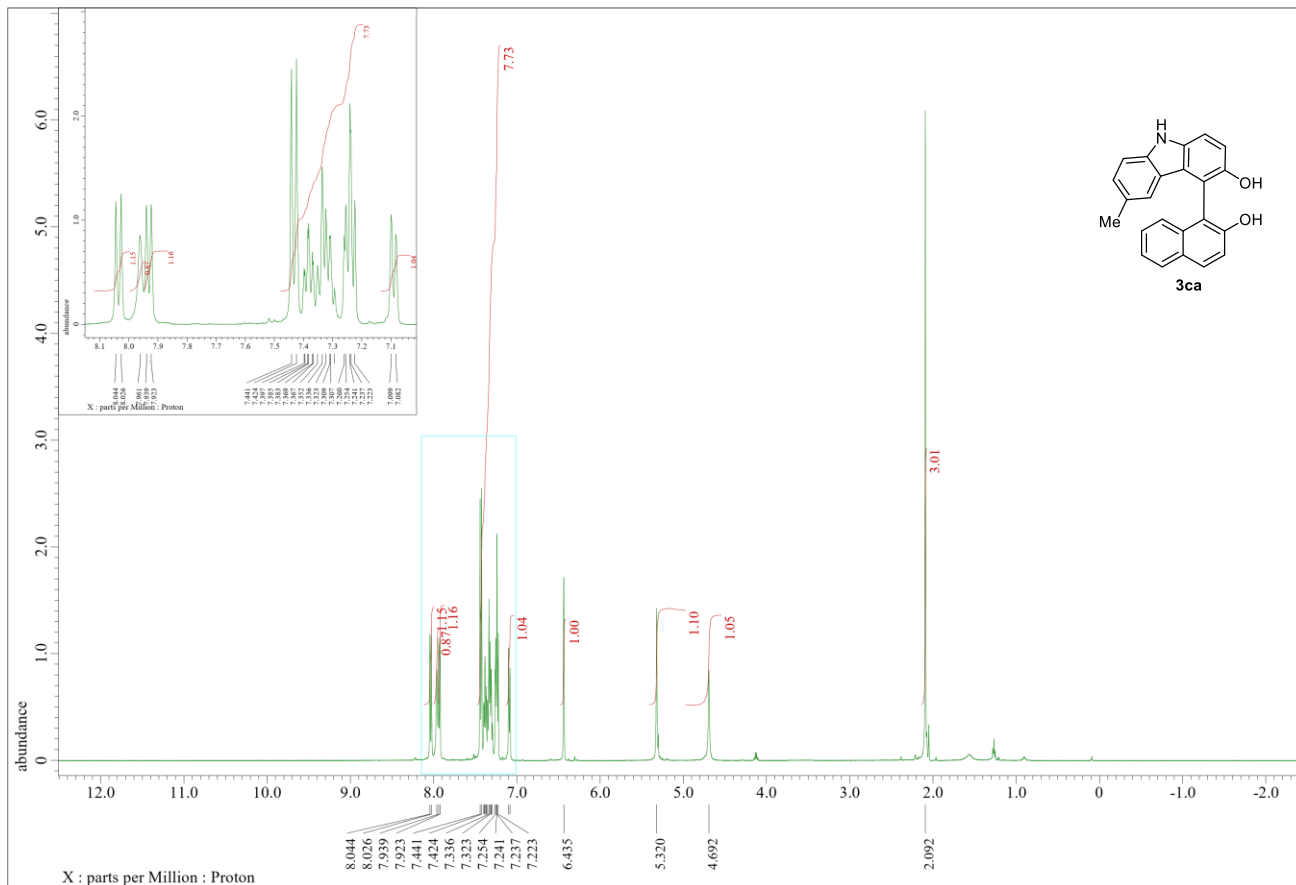

<sup>1</sup>H NMR spectrum (500 MHz, CDCl<sub>3</sub>) of **3ca**

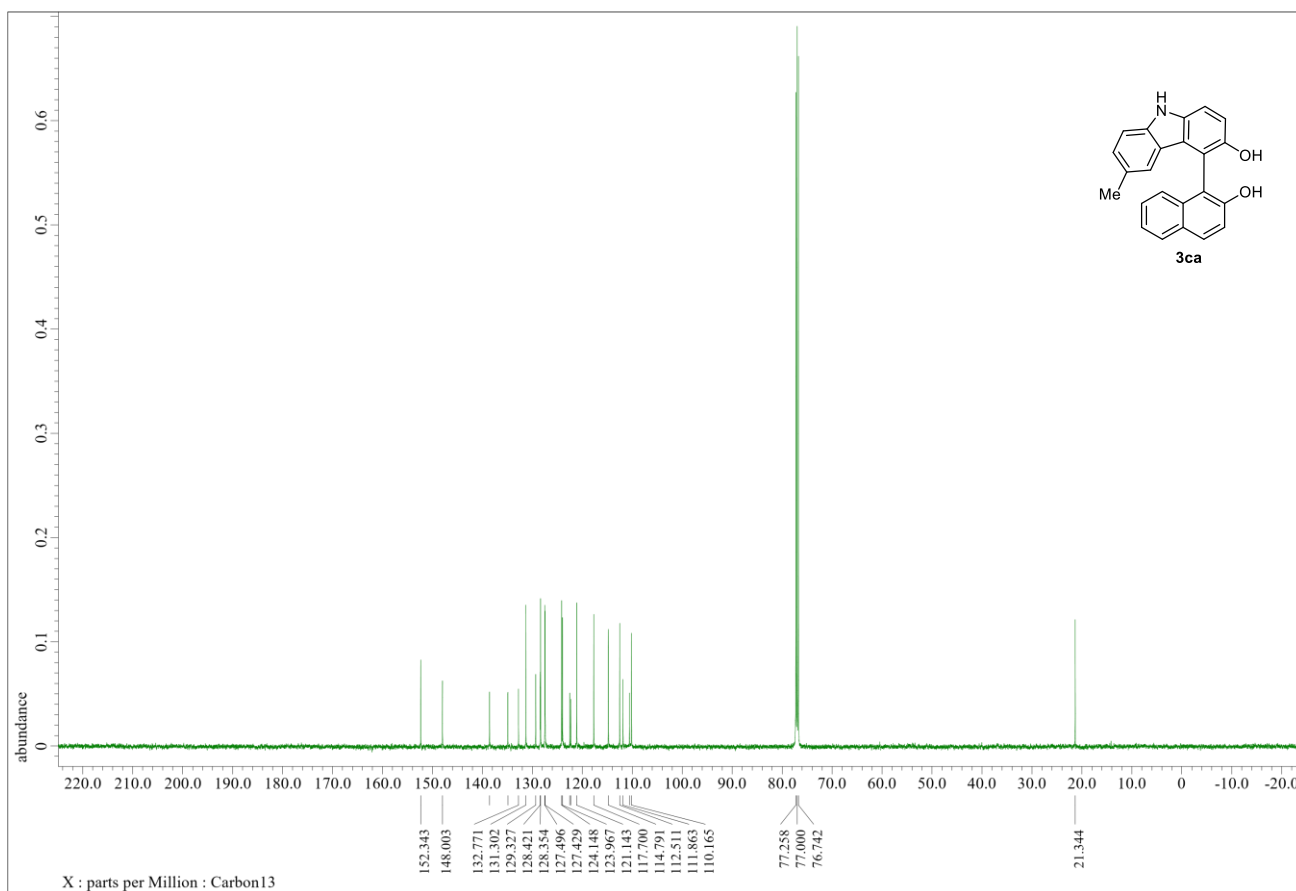

<sup>13</sup>C NMR spectrum (125 MHz, CDCl<sub>3</sub>) of **3ca**

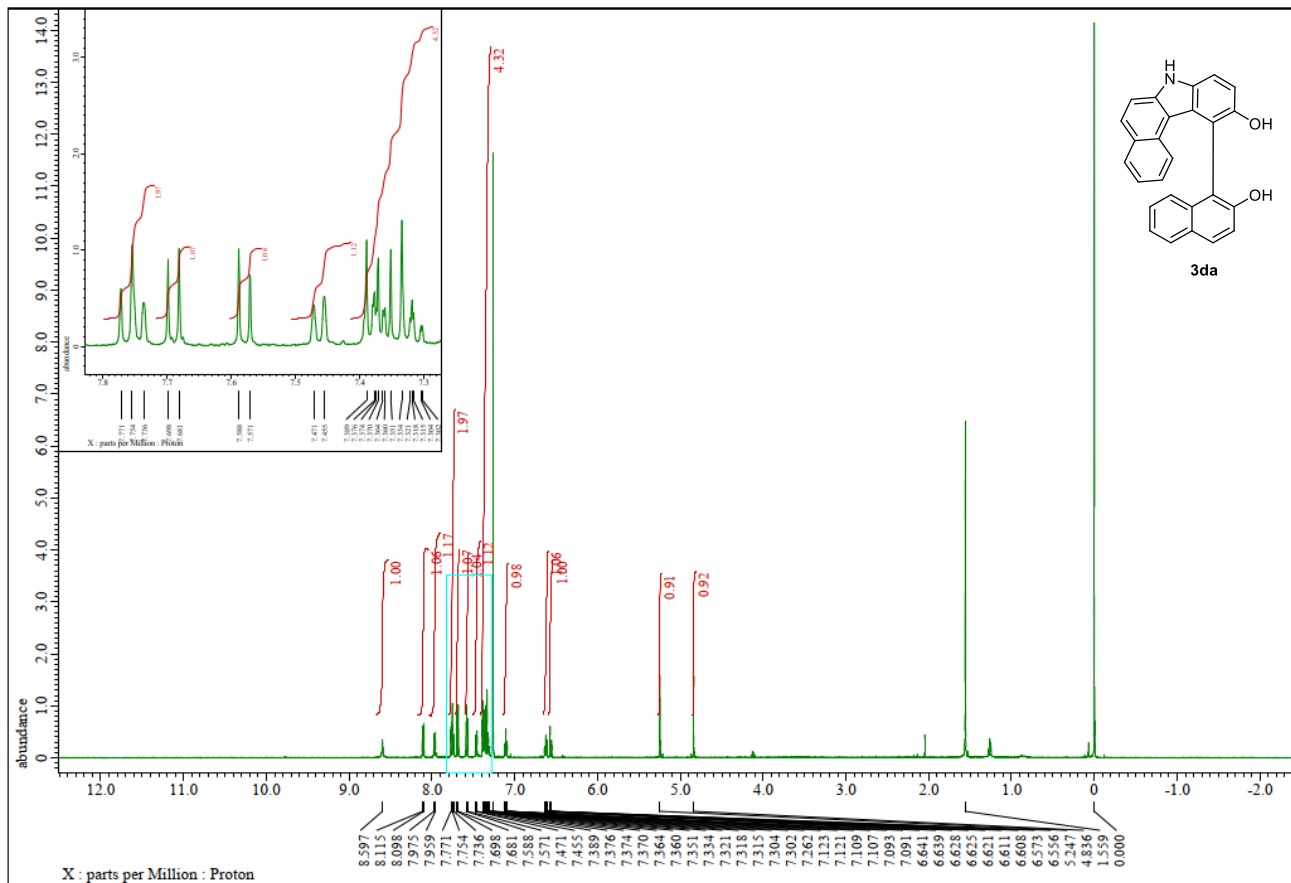

<sup>1</sup>H NMR spectrum (500 MHz, CDCl<sub>3</sub>) of **3da**

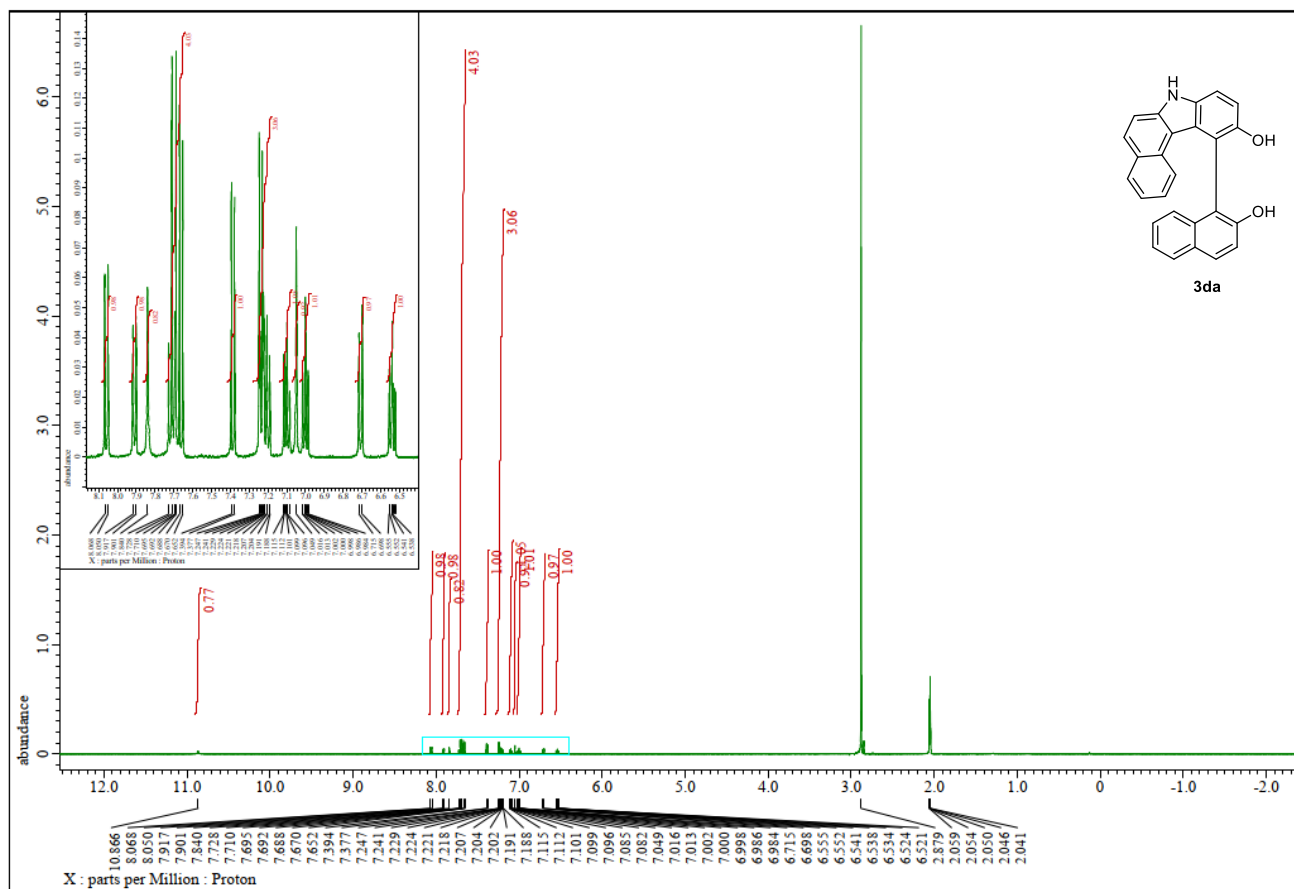

<sup>1</sup>H NMR spectrum (500 MHz, acetone-d<sub>6</sub>) of **3da**

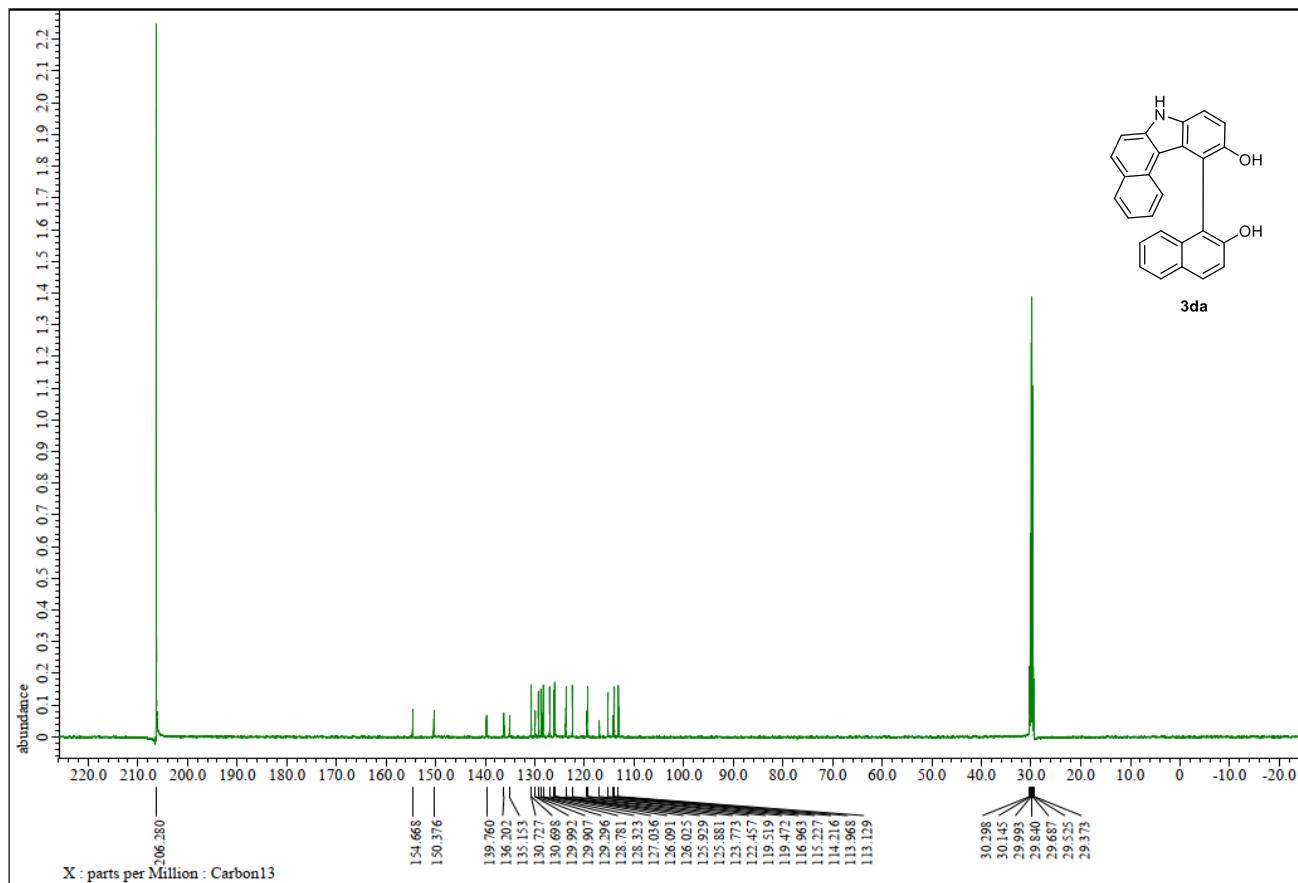

$^{13}\text{C}$  NMR spectrum (125 MHz, acetone- $d_6$ ) of **3da**

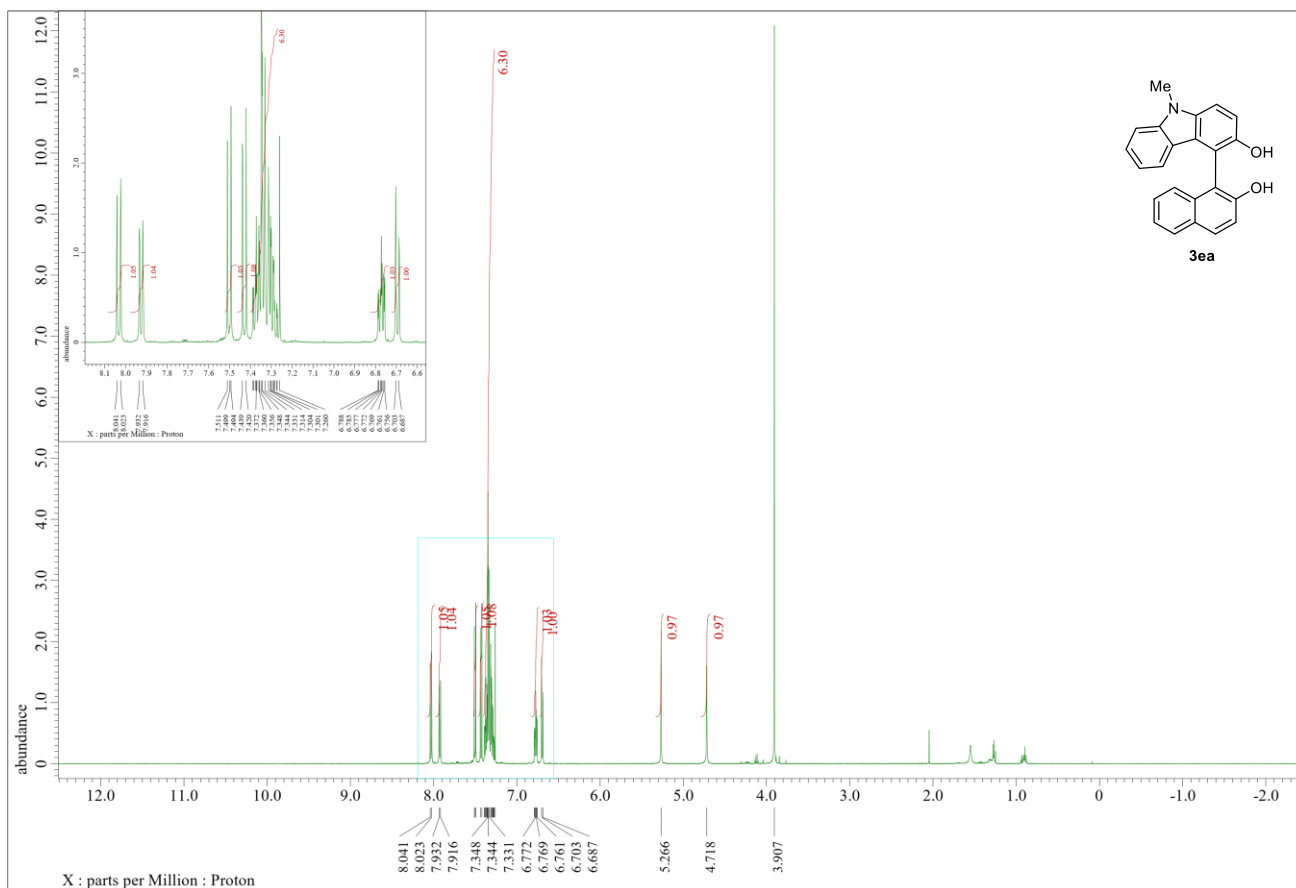

<sup>1</sup>H NMR spectrum (500 MHz, CDCl<sub>3</sub>) of **3ea**

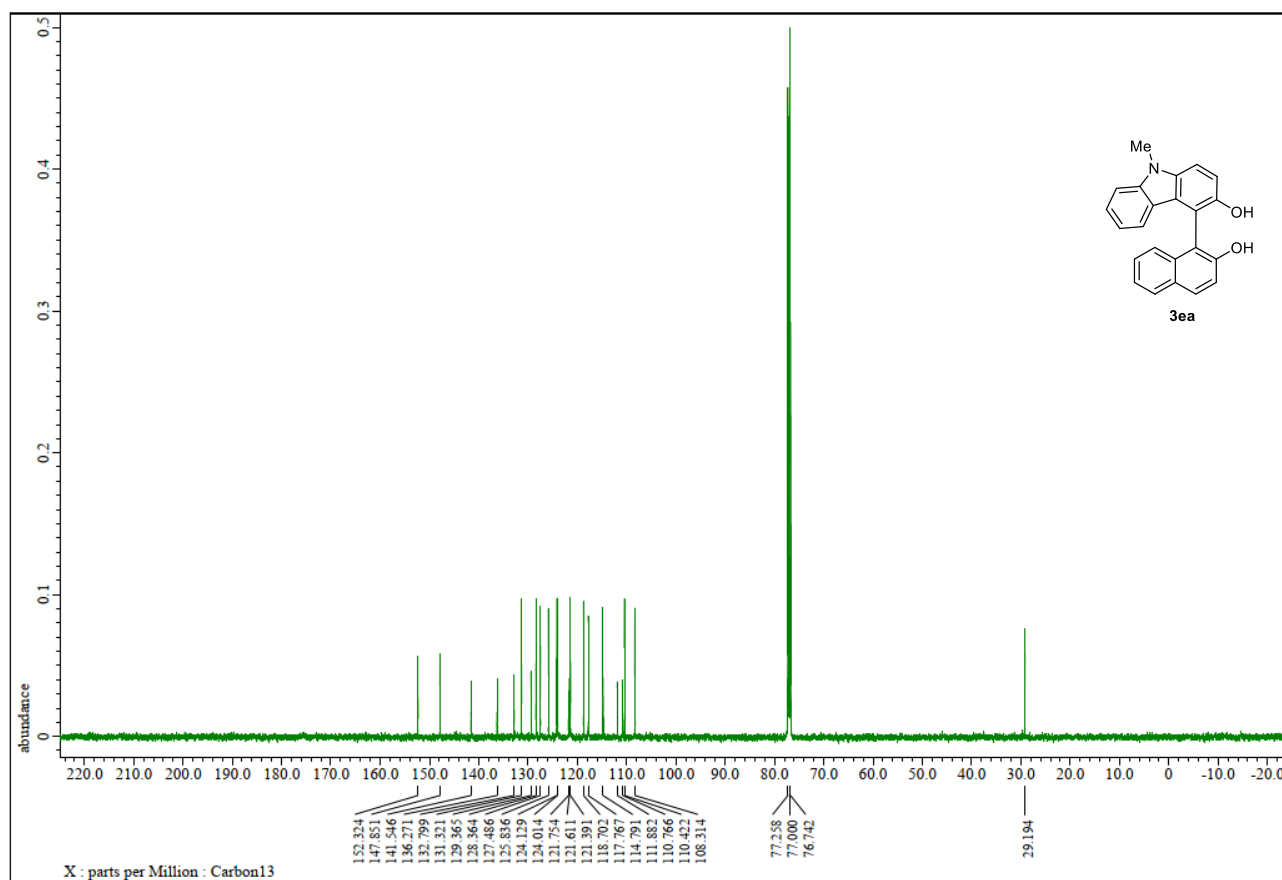

<sup>13</sup>C NMR spectrum (125 MHz, CDCl<sub>3</sub>) of **3ea**



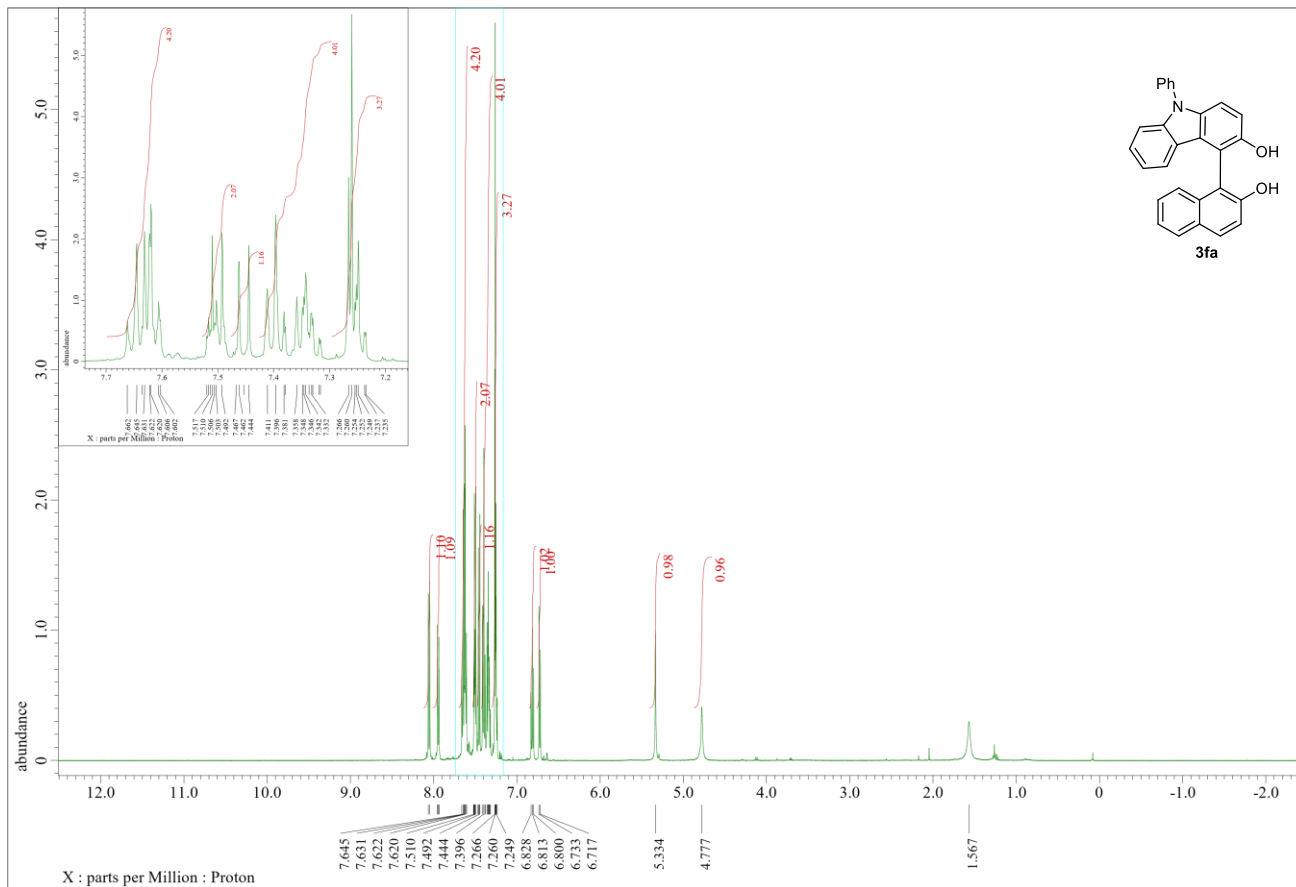

<sup>1</sup>H NMR spectrum (500 MHz, CDCl<sub>3</sub>) of **3fa**

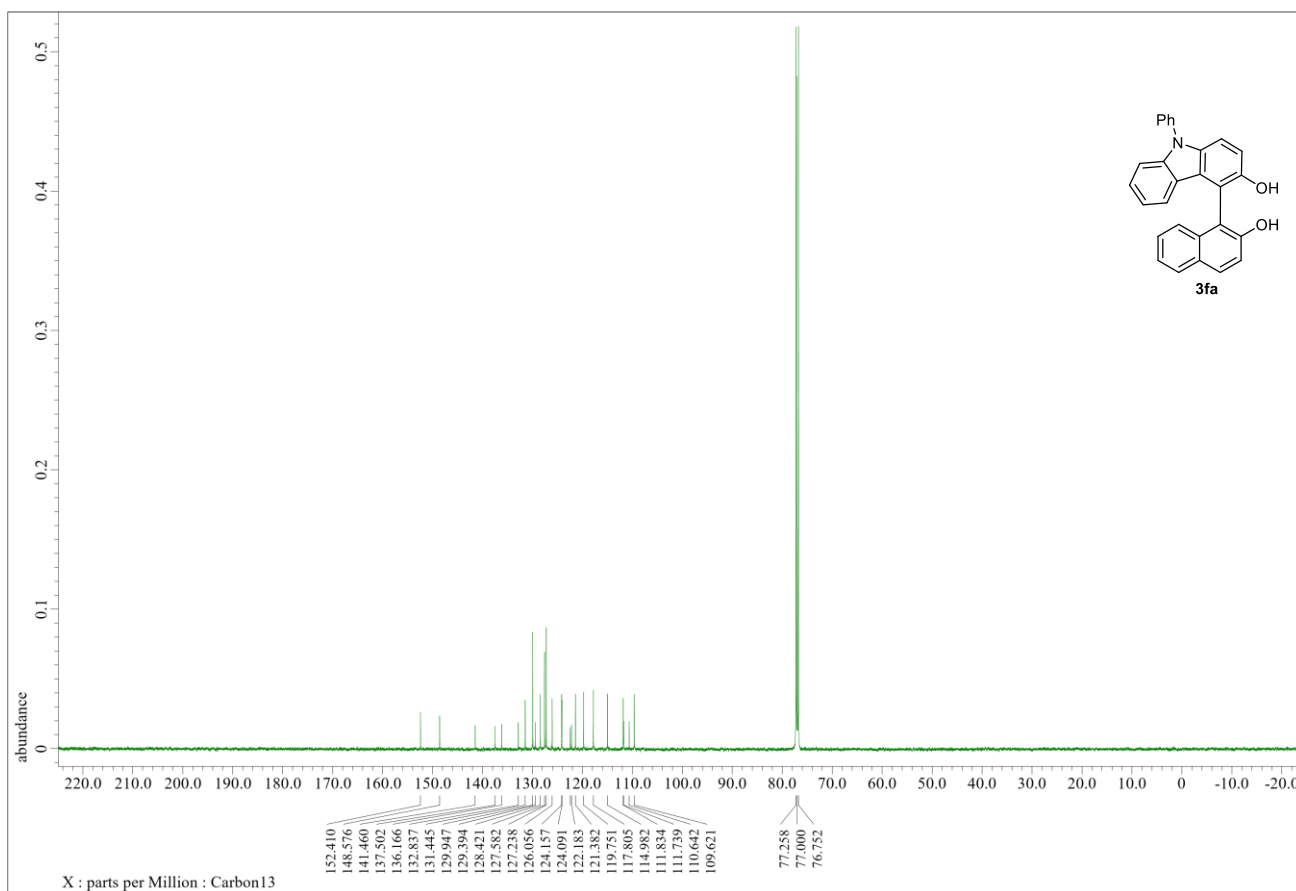

<sup>13</sup>C NMR spectrum (125 MHz, CDCl<sub>3</sub>) of **3fa**

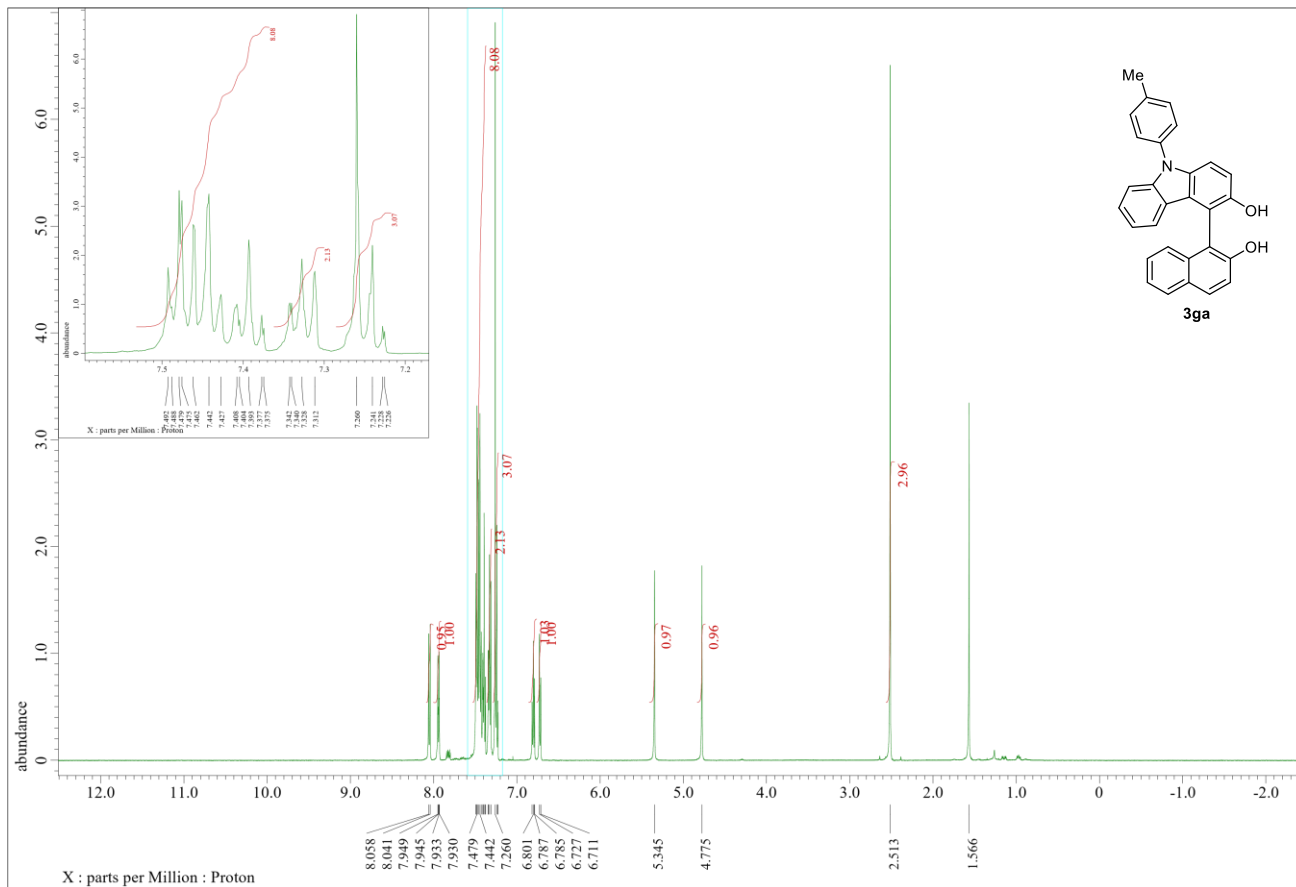

<sup>1</sup>H NMR spectrum (500 MHz, CDCl<sub>3</sub>) of **3ga**

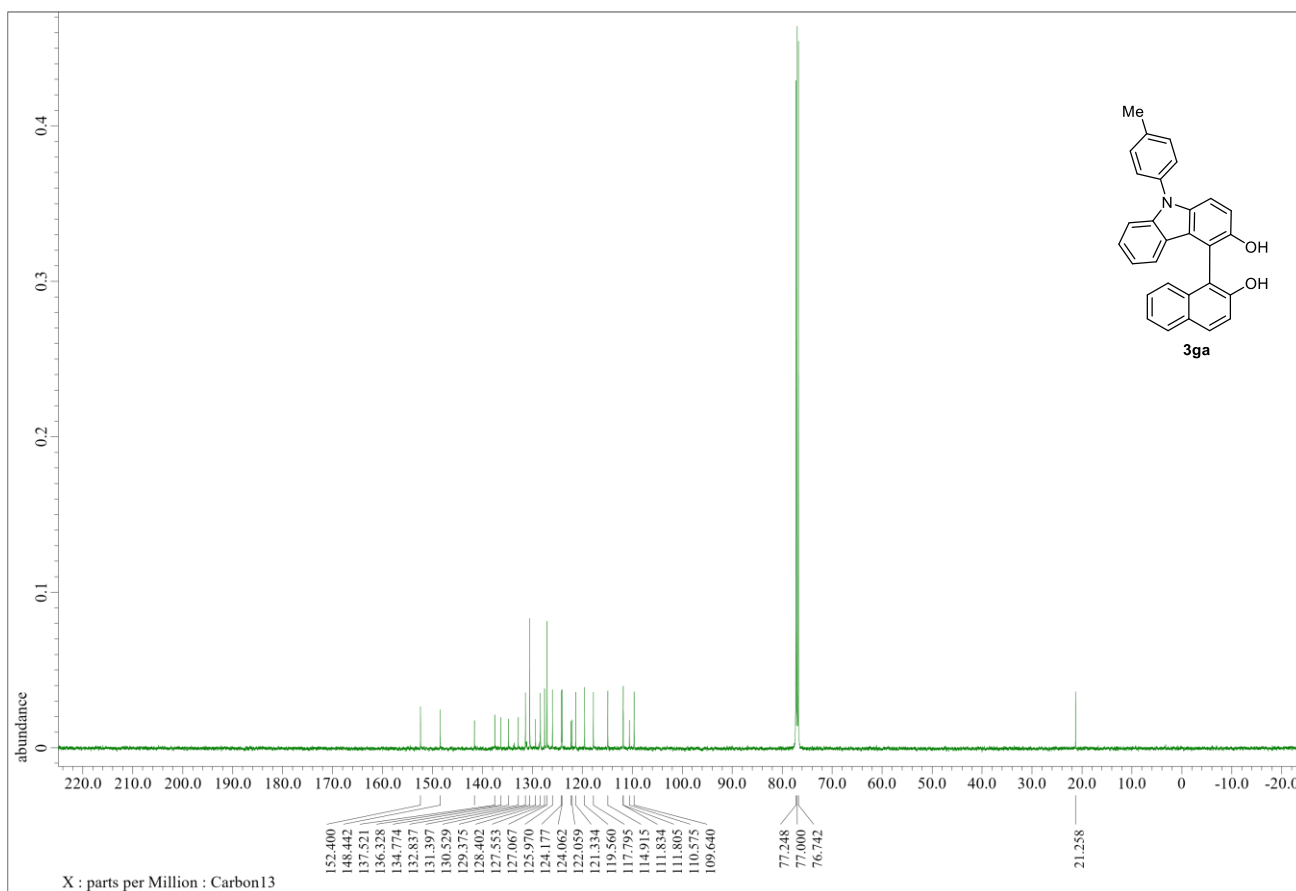

<sup>13</sup>C NMR spectrum (125 MHz, CDCl<sub>3</sub>) of **3ga**

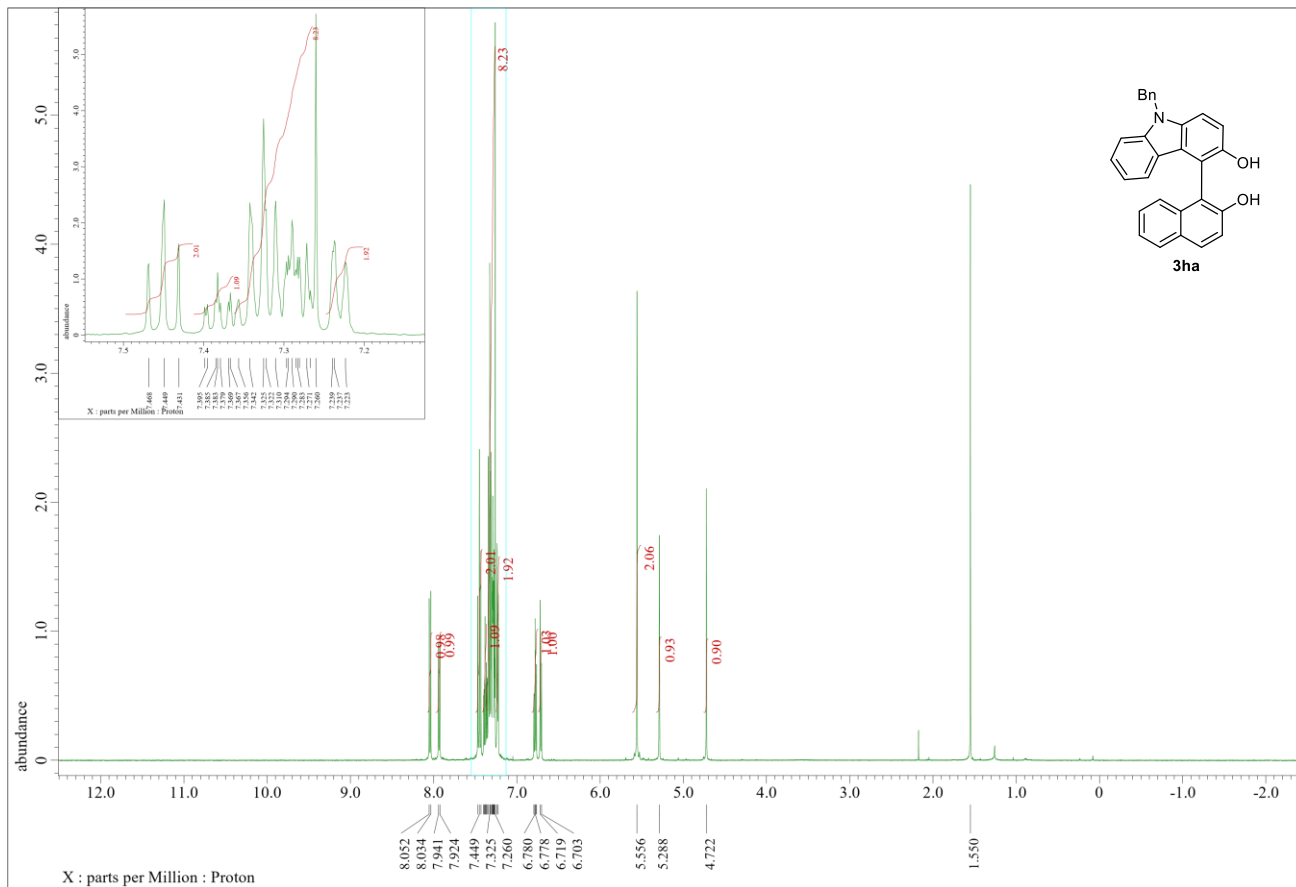

**<sup>1</sup>H NMR spectrum (500 MHz, CDCl<sub>3</sub>) of 3ha**

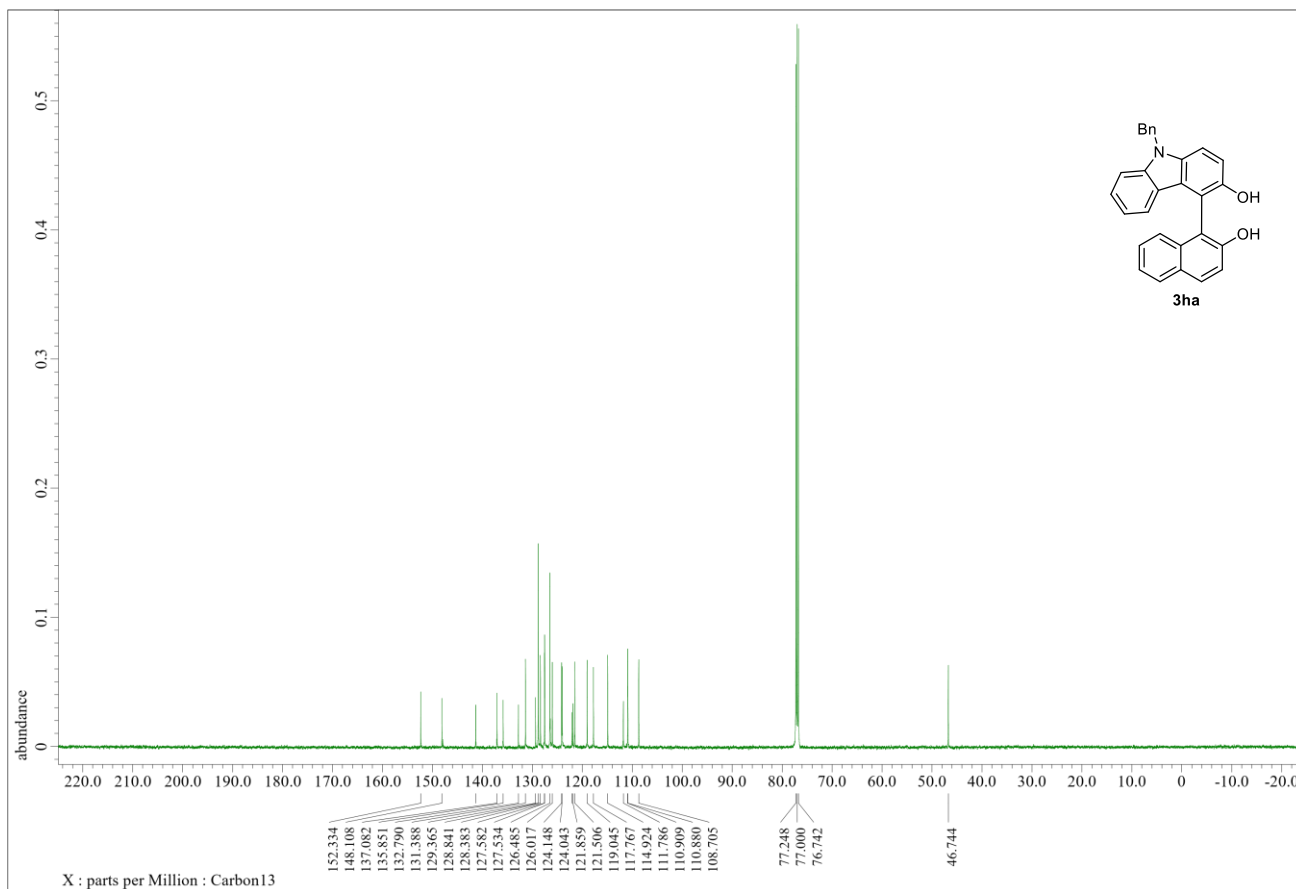

**<sup>13</sup>C NMR spectrum (125 MHz, CDCl<sub>3</sub>) of 3ha**

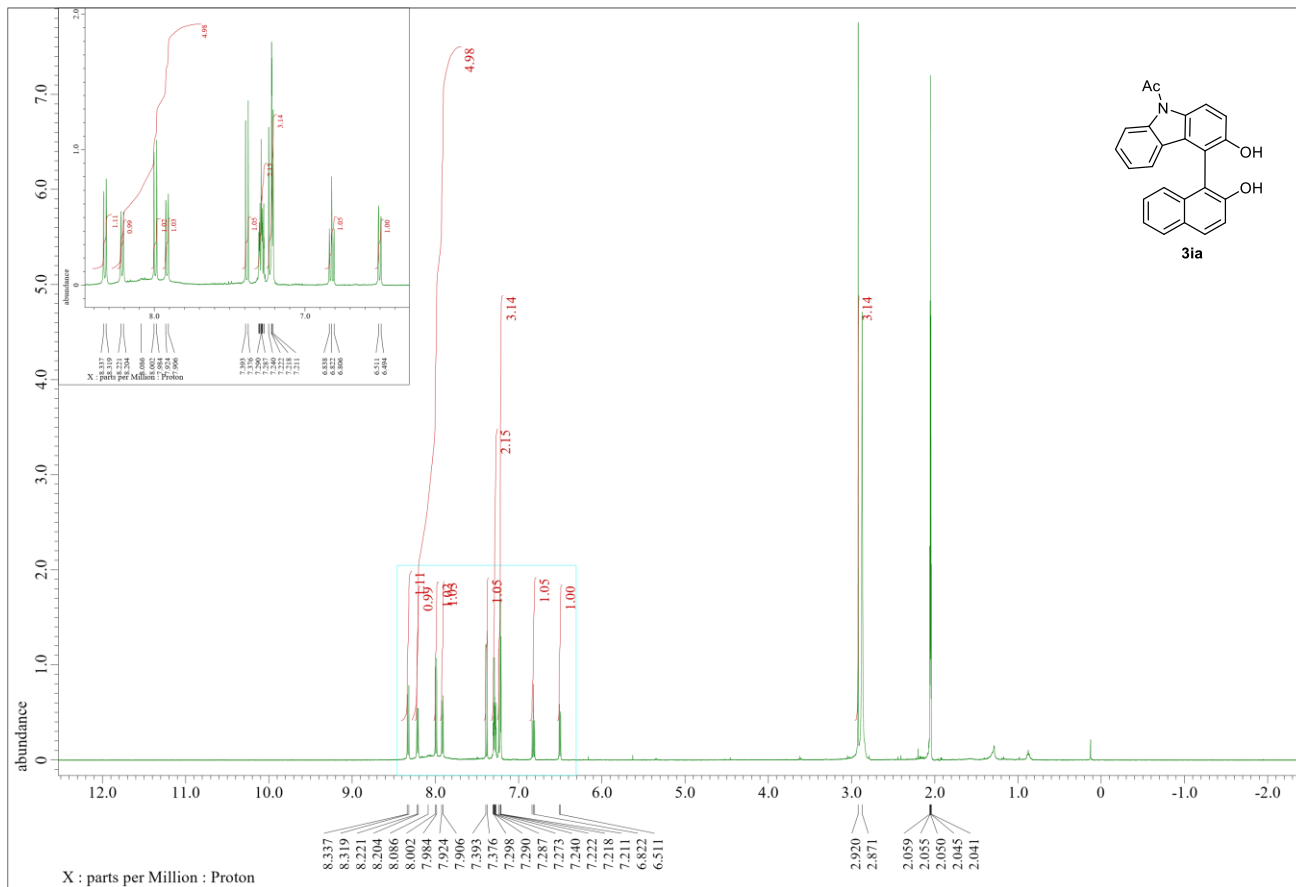

**<sup>1</sup>H NMR spectrum (500 MHz, acetone-*d*<sub>6</sub>) of **3ia****

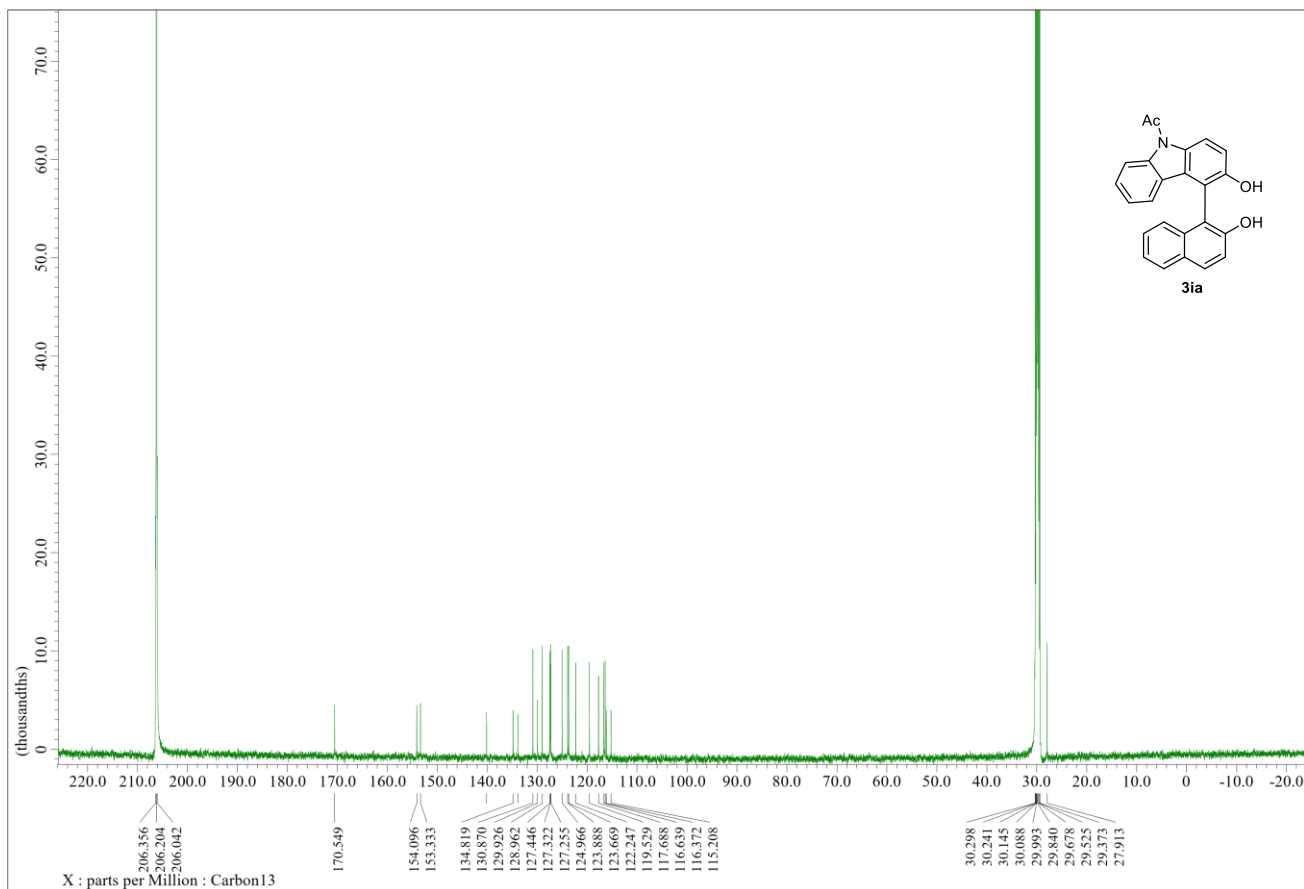

**<sup>13</sup>C NMR spectrum (125 MHz, acetone-*d*<sub>6</sub>) of **3ia****

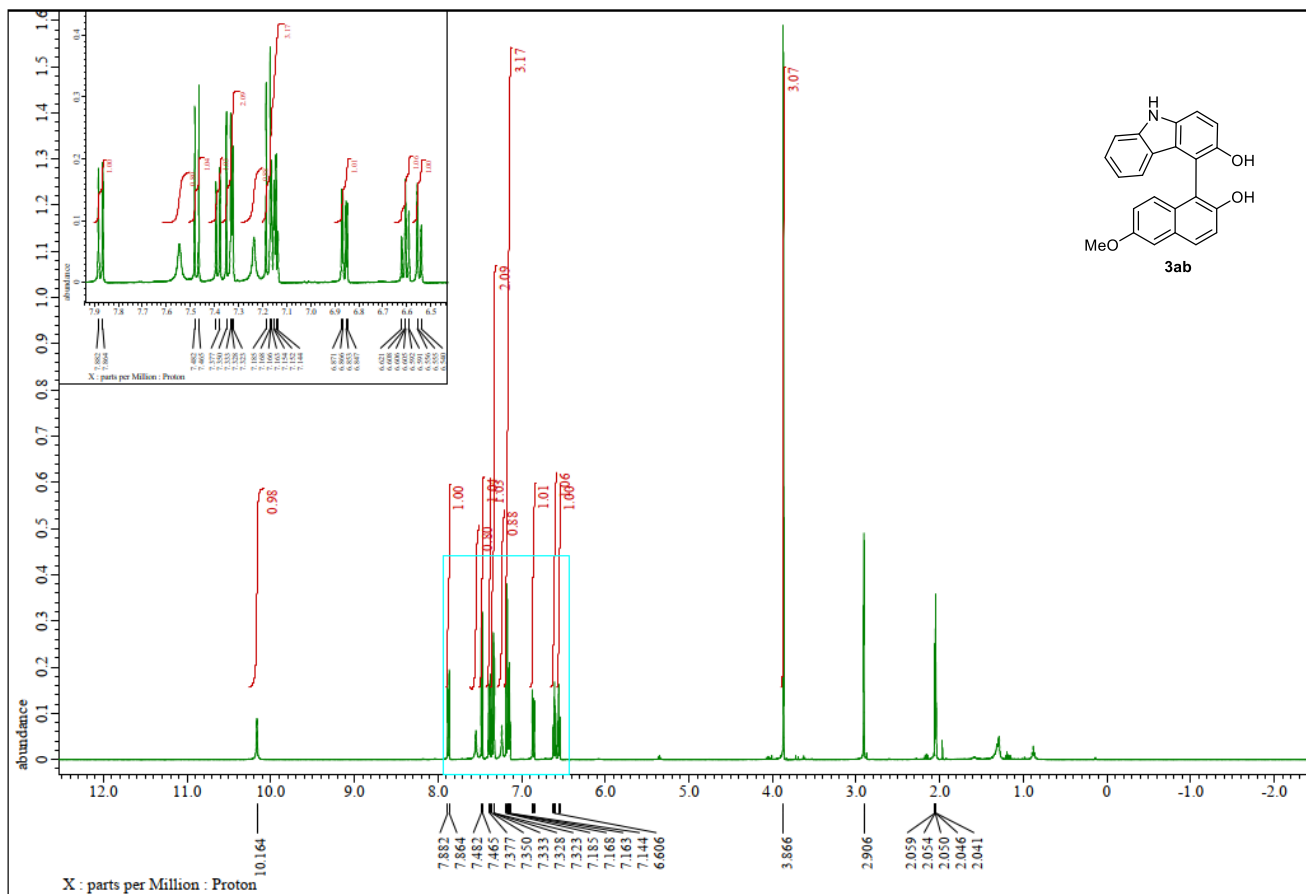

<sup>1</sup>H NMR spectrum (500 MHz, acetone-*d*<sub>6</sub>) of **3ab**

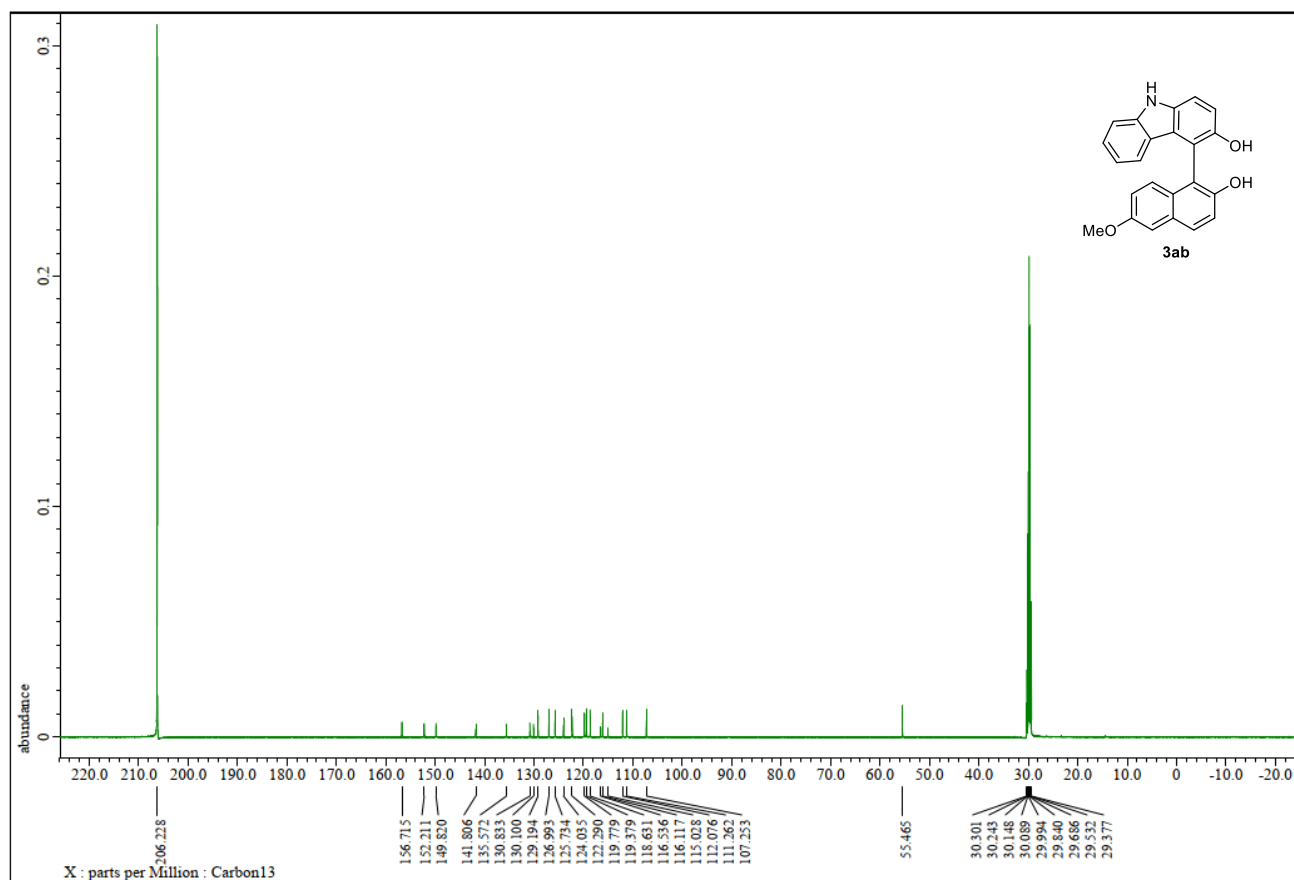

<sup>13</sup>C NMR spectrum (125 MHz, acetone-*d*<sub>6</sub>) of **3ab**

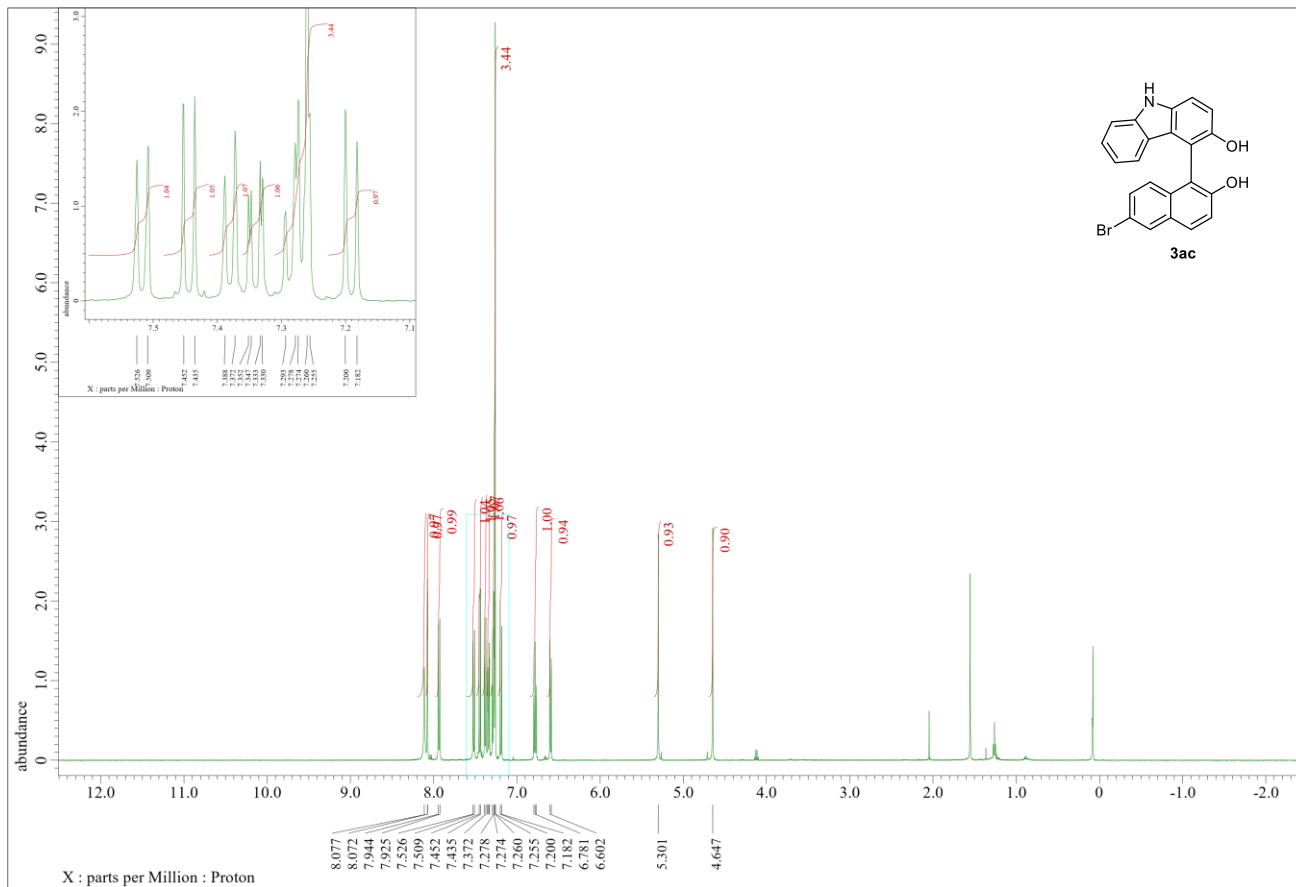

$^1\text{H}$  NMR spectrum (500 MHz,  $\text{CDCl}_3$ ) of **3ac**

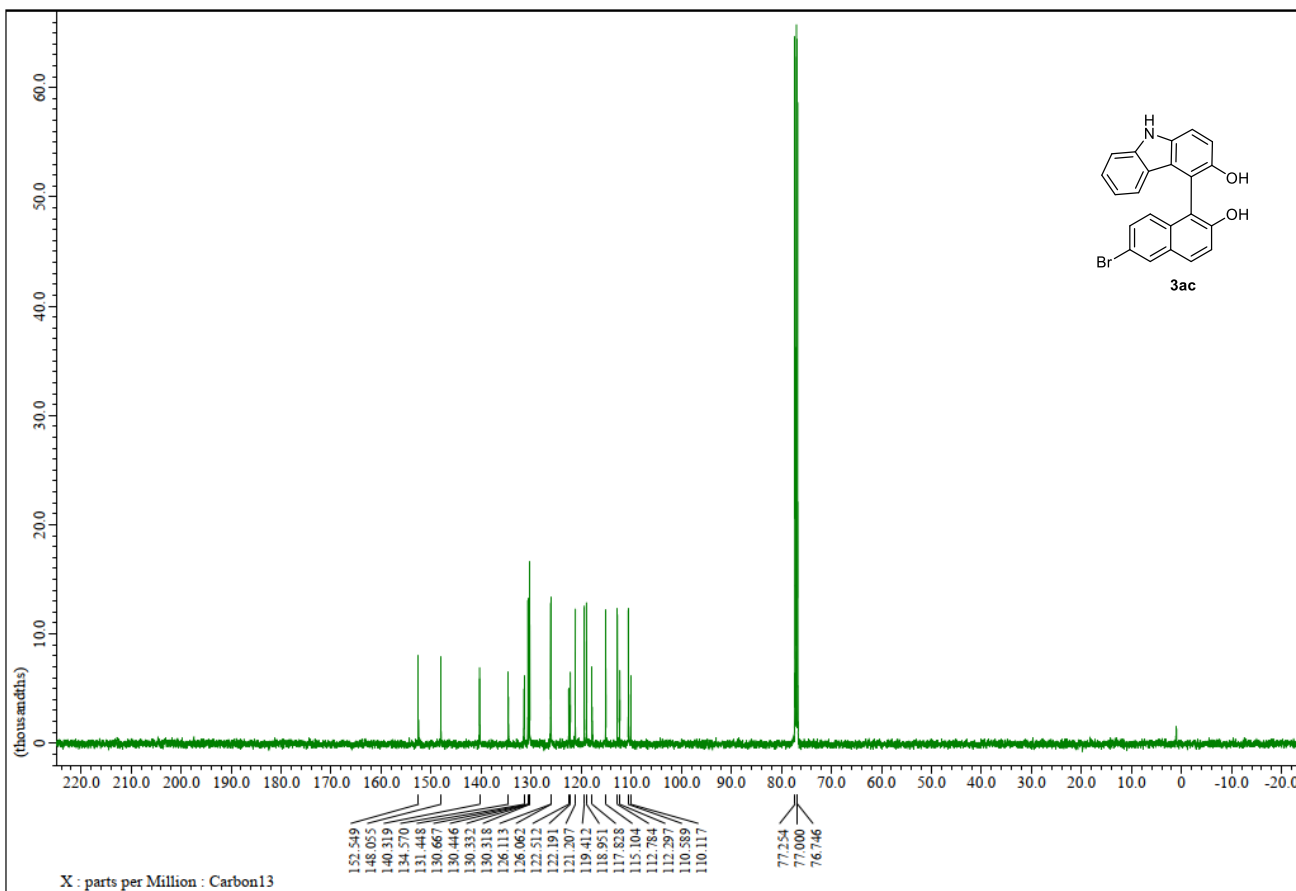

$^{13}\text{C}$  NMR spectrum (125 MHz,  $\text{CDCl}_3$ ) of **3ac**

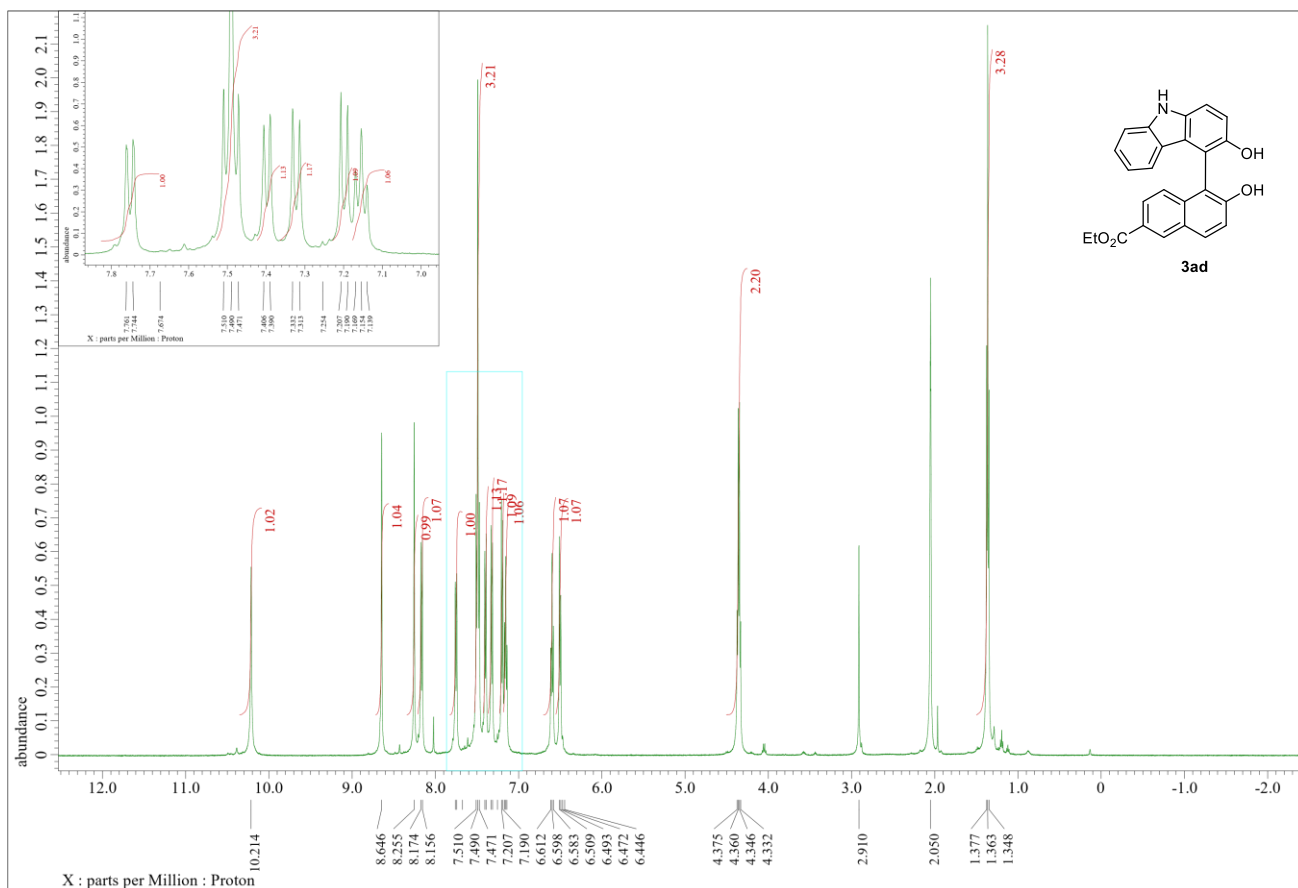

<sup>1</sup>H NMR spectrum (500 MHz, acetone-*d*<sub>6</sub>) of 3ad

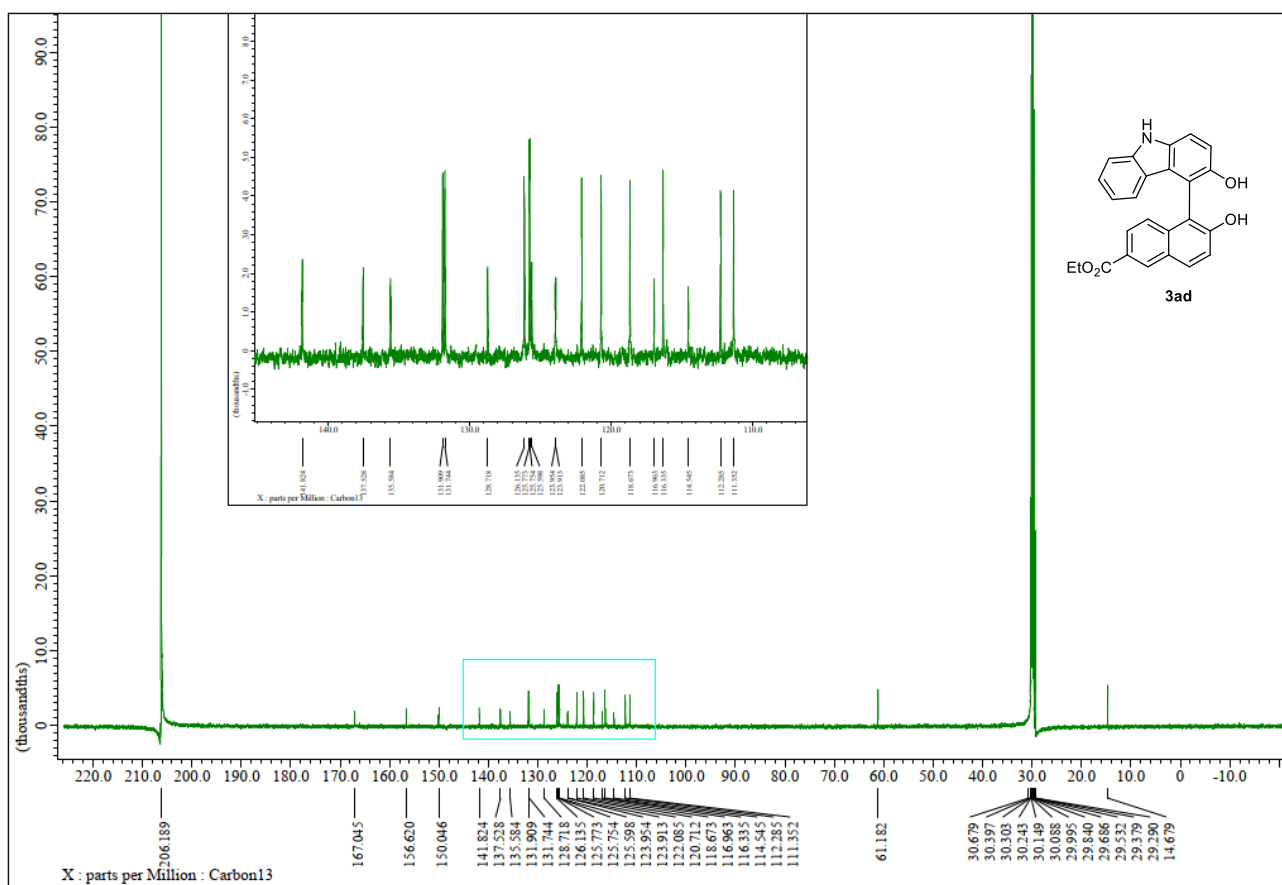

<sup>13</sup>C NMR spectrum (125 MHz, acetone-*d*<sub>6</sub>) of 3ad

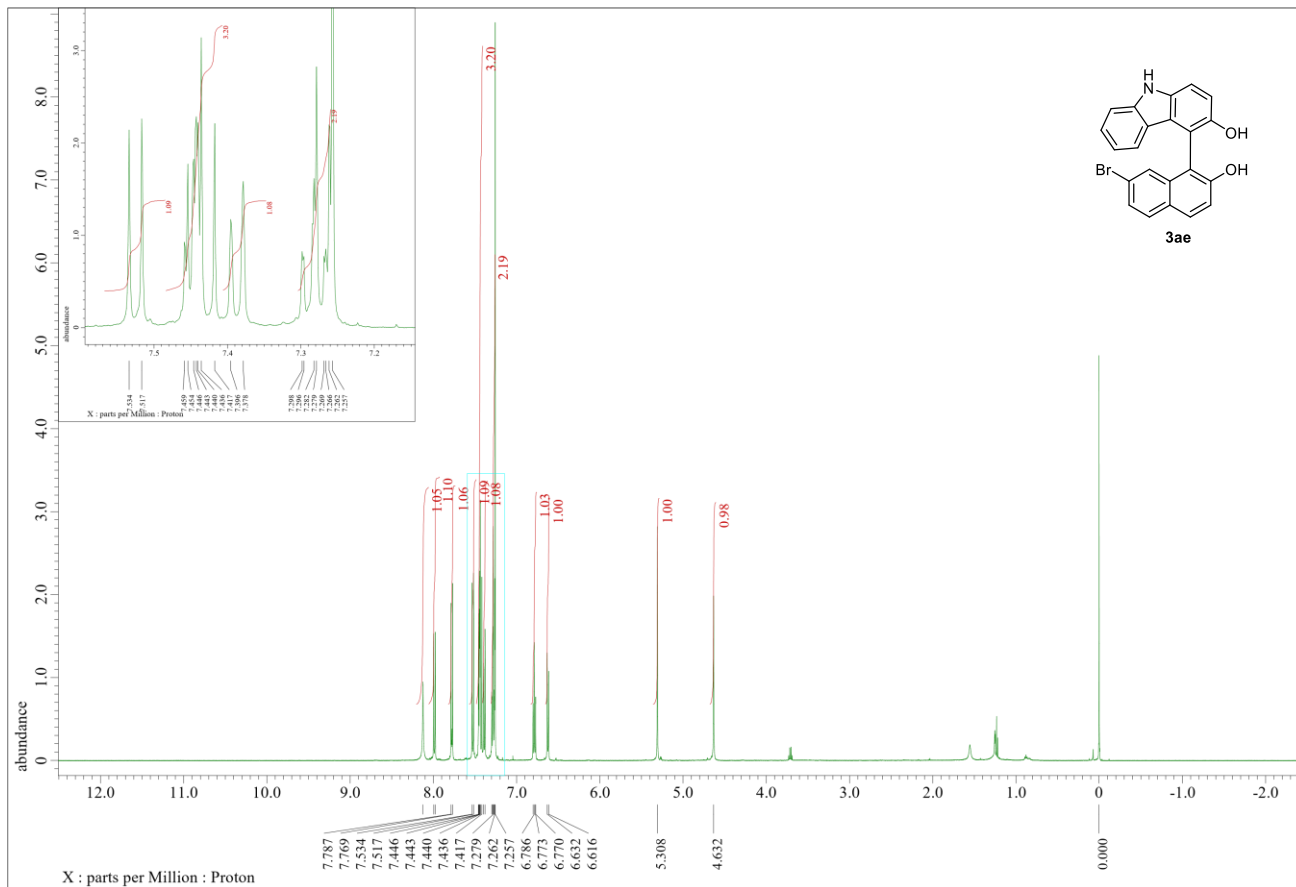

<sup>1</sup>H NMR spectrum (500 MHz, CDCl<sub>3</sub>) of **3ae**

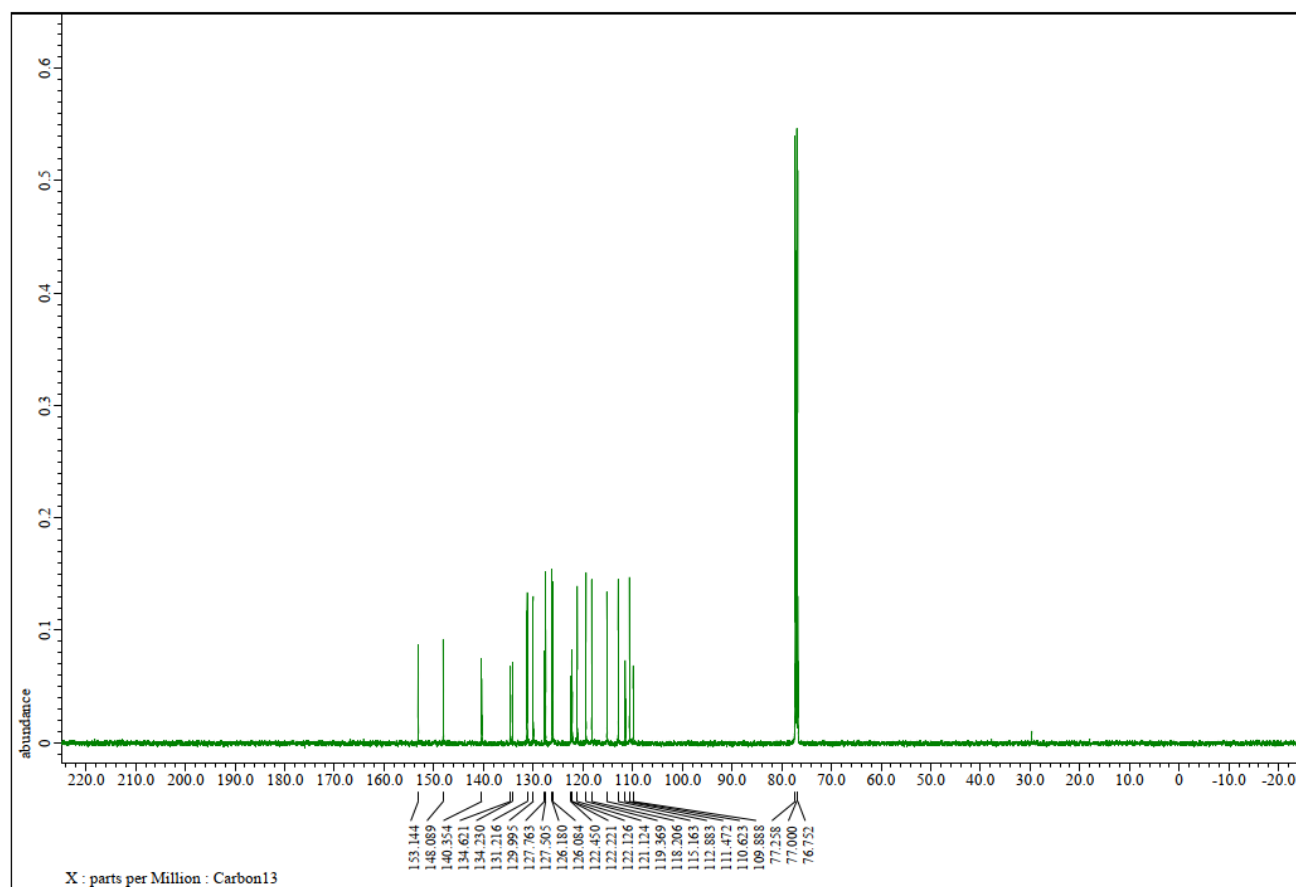

<sup>13</sup>C NMR spectrum (125 MHz, CDCl<sub>3</sub>) of **3ae**



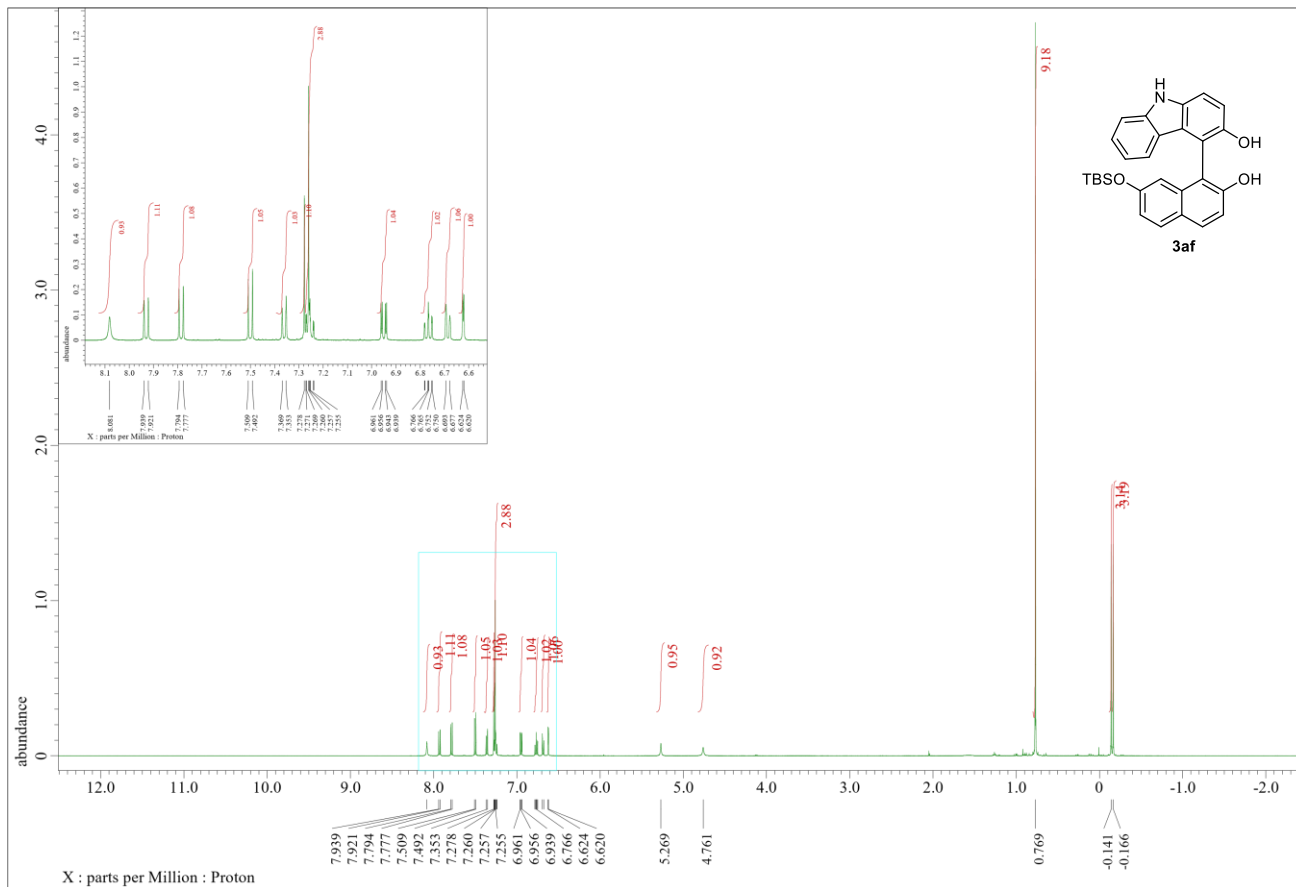

<sup>1</sup>H NMR spectrum (500 MHz, CDCl<sub>3</sub>) of **3af**

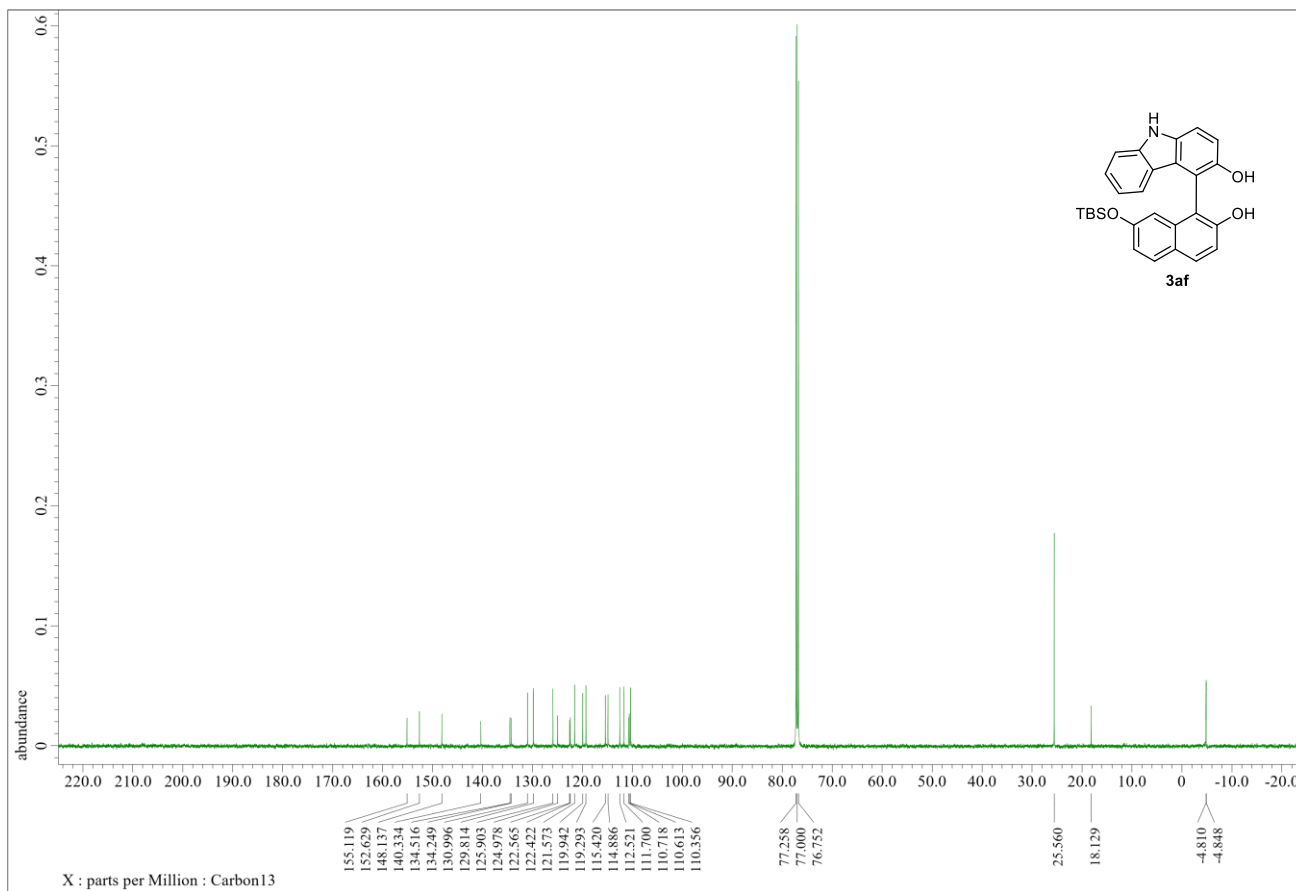

<sup>13</sup>C NMR spectrum (125 MHz, CDCl<sub>3</sub>) of **3af**

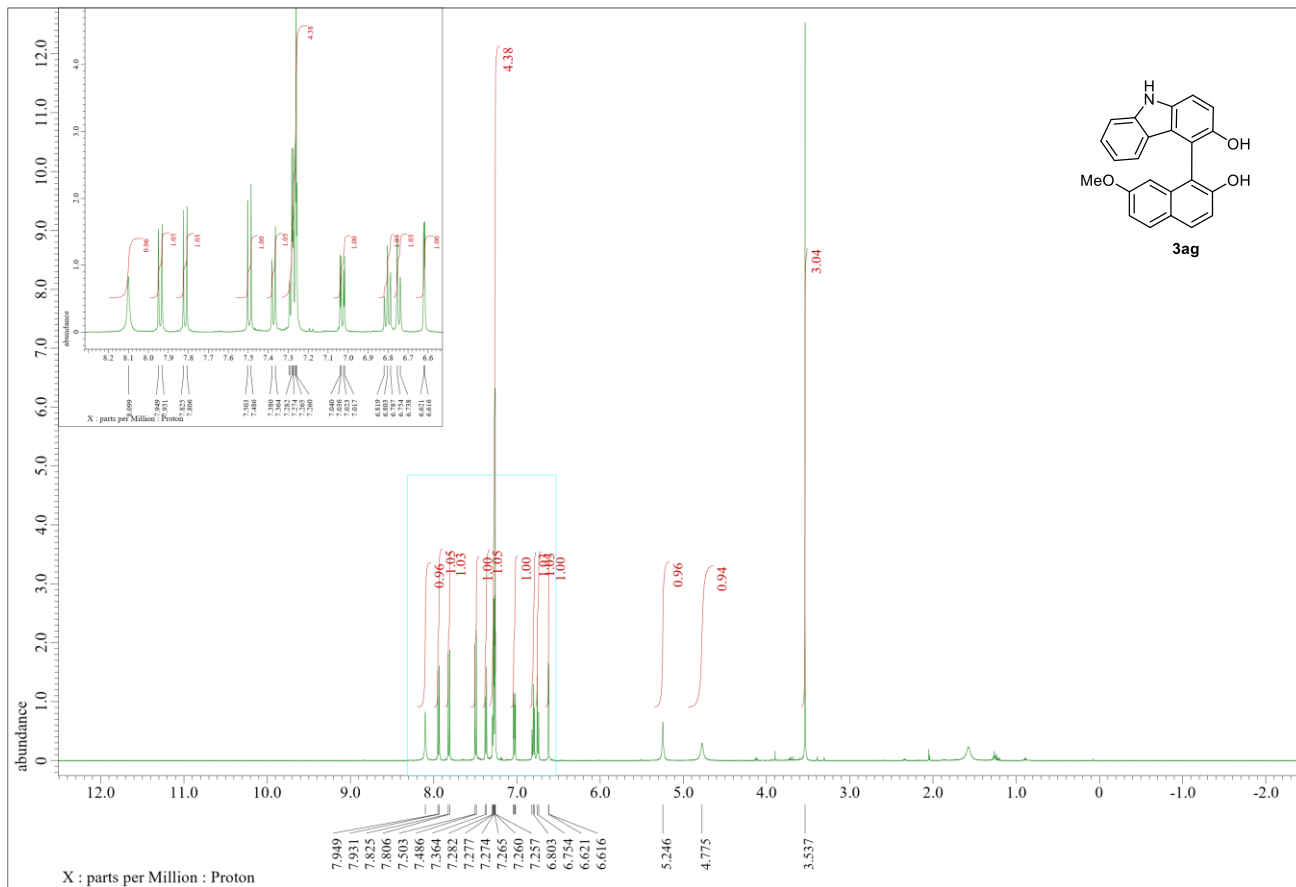

<sup>1</sup>H NMR spectrum (500 MHz, CDCl<sub>3</sub>) of **3ag**

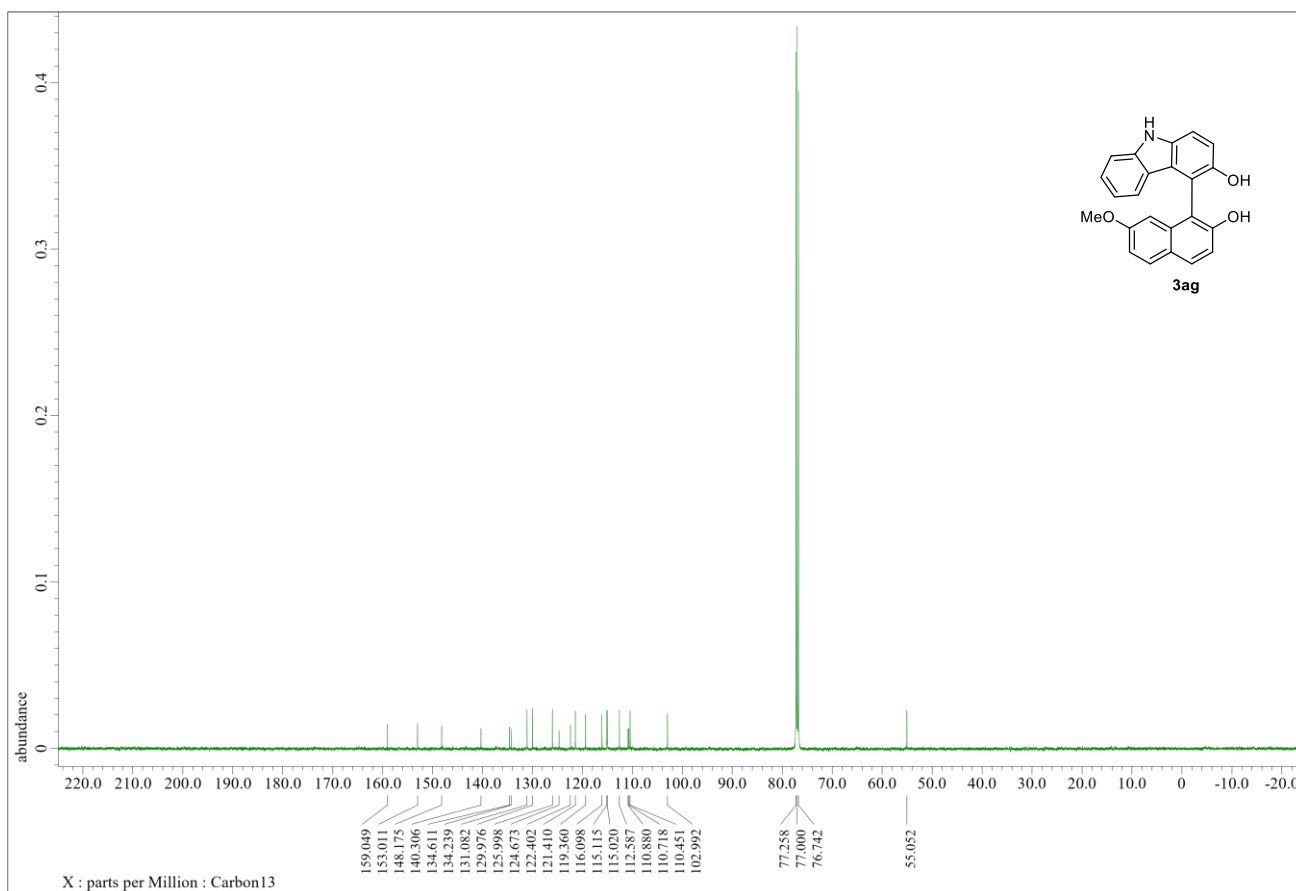

<sup>13</sup>C NMR spectrum (125 MHz, CDCl<sub>3</sub>) of **3ag**

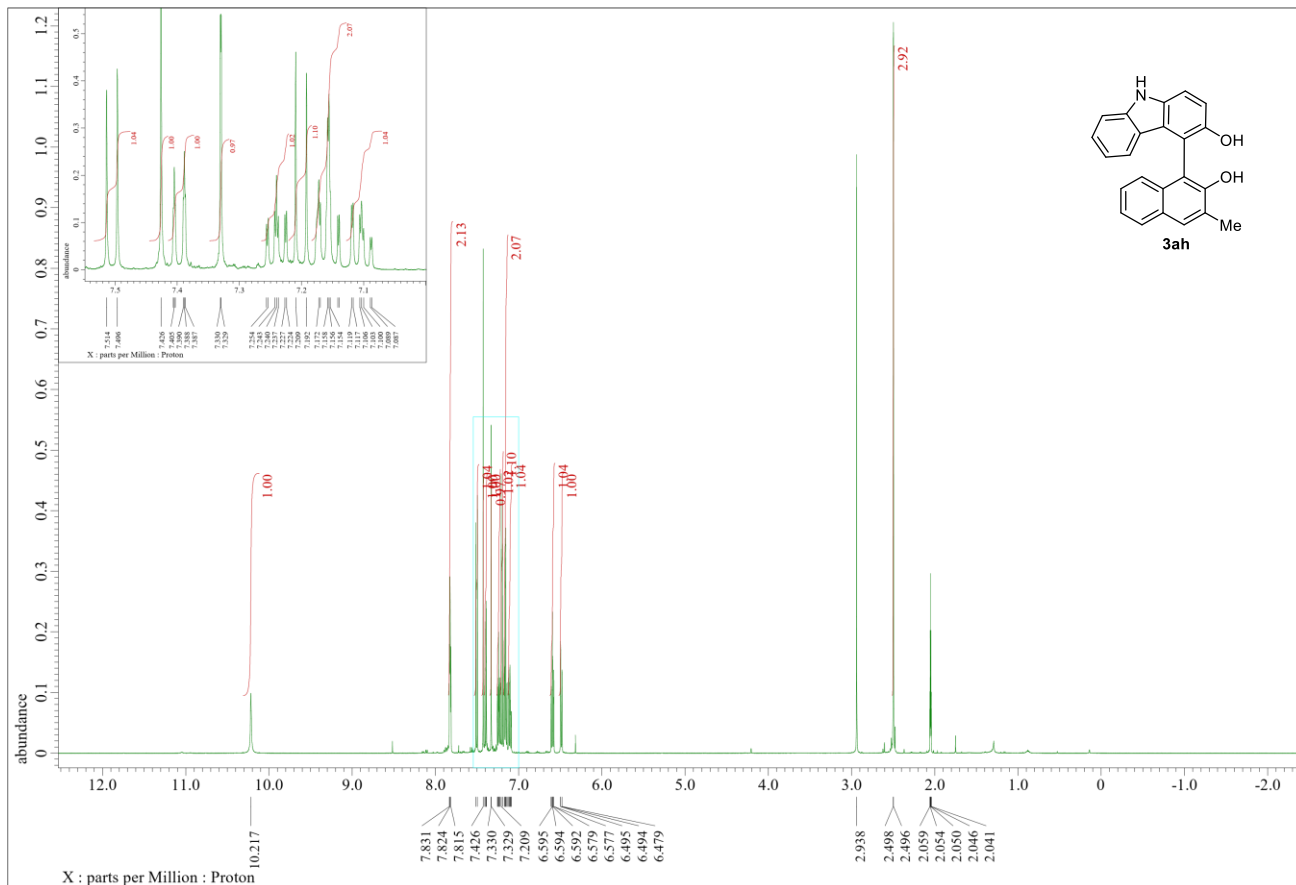

<sup>1</sup>H NMR spectrum (500 MHz, acetone-*d*<sub>6</sub>) of **3ah**

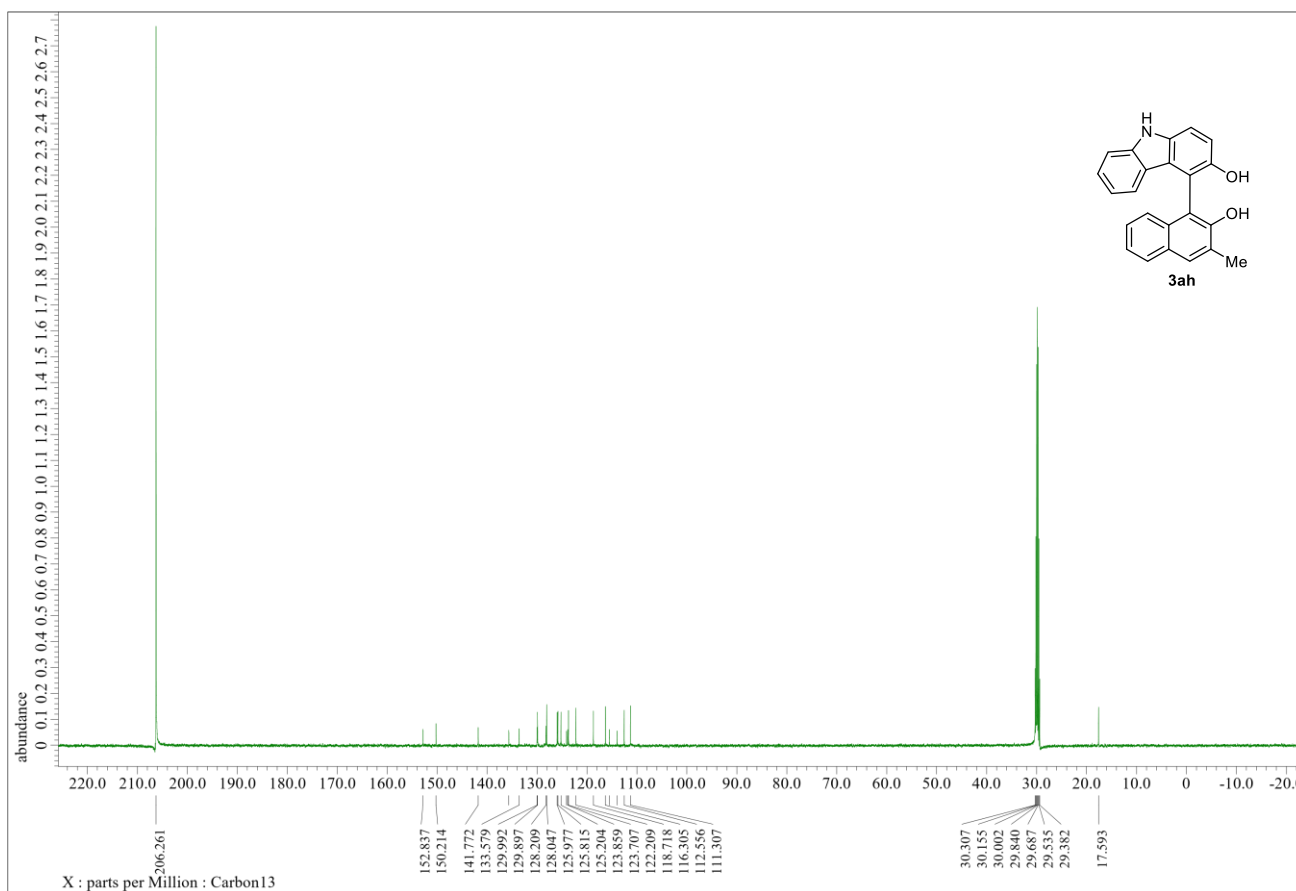

<sup>13</sup>C NMR spectrum (125 MHz, acetone-*d*<sub>6</sub>) of **3ah**

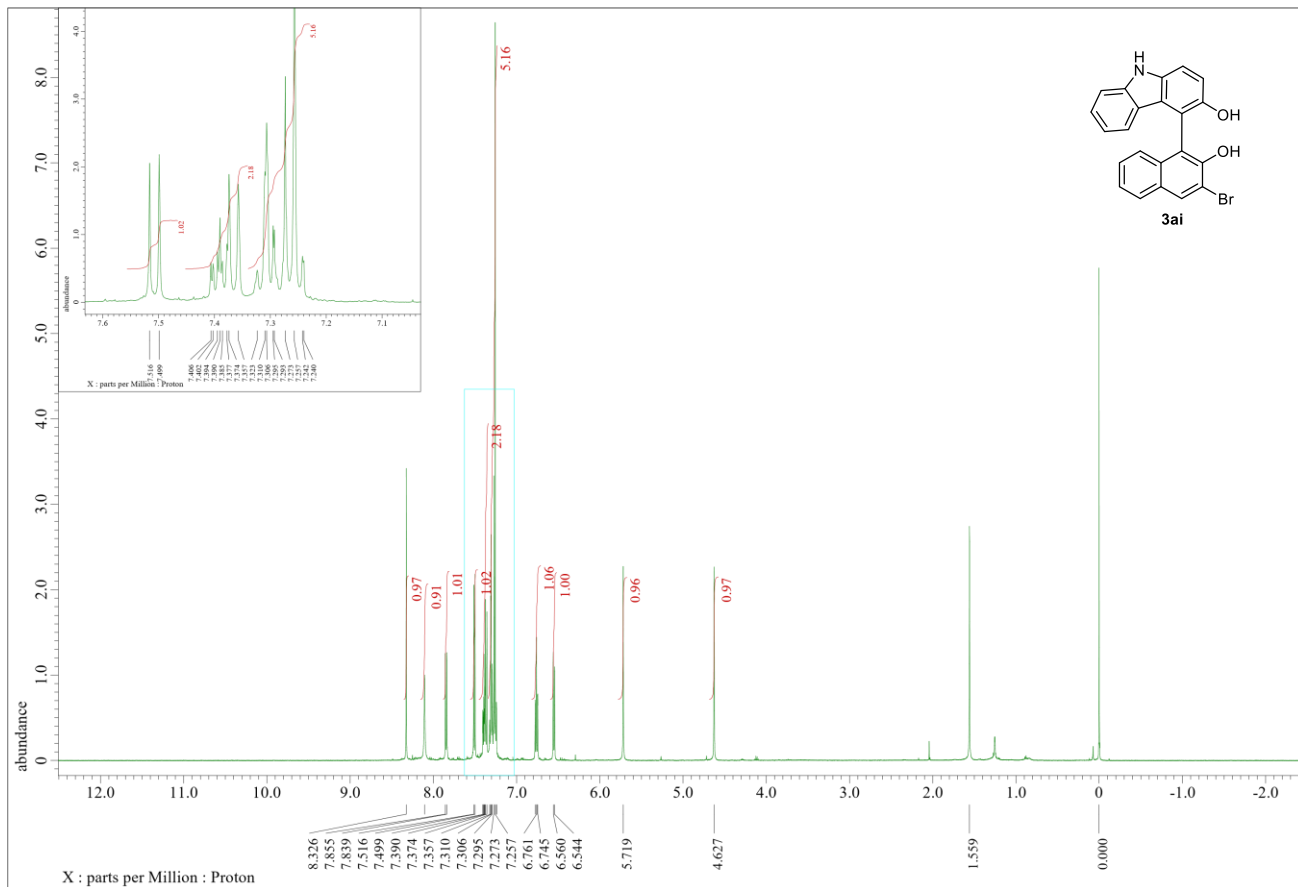

<sup>1</sup>H NMR spectrum (500 MHz, CDCl<sub>3</sub>) of **3ai**

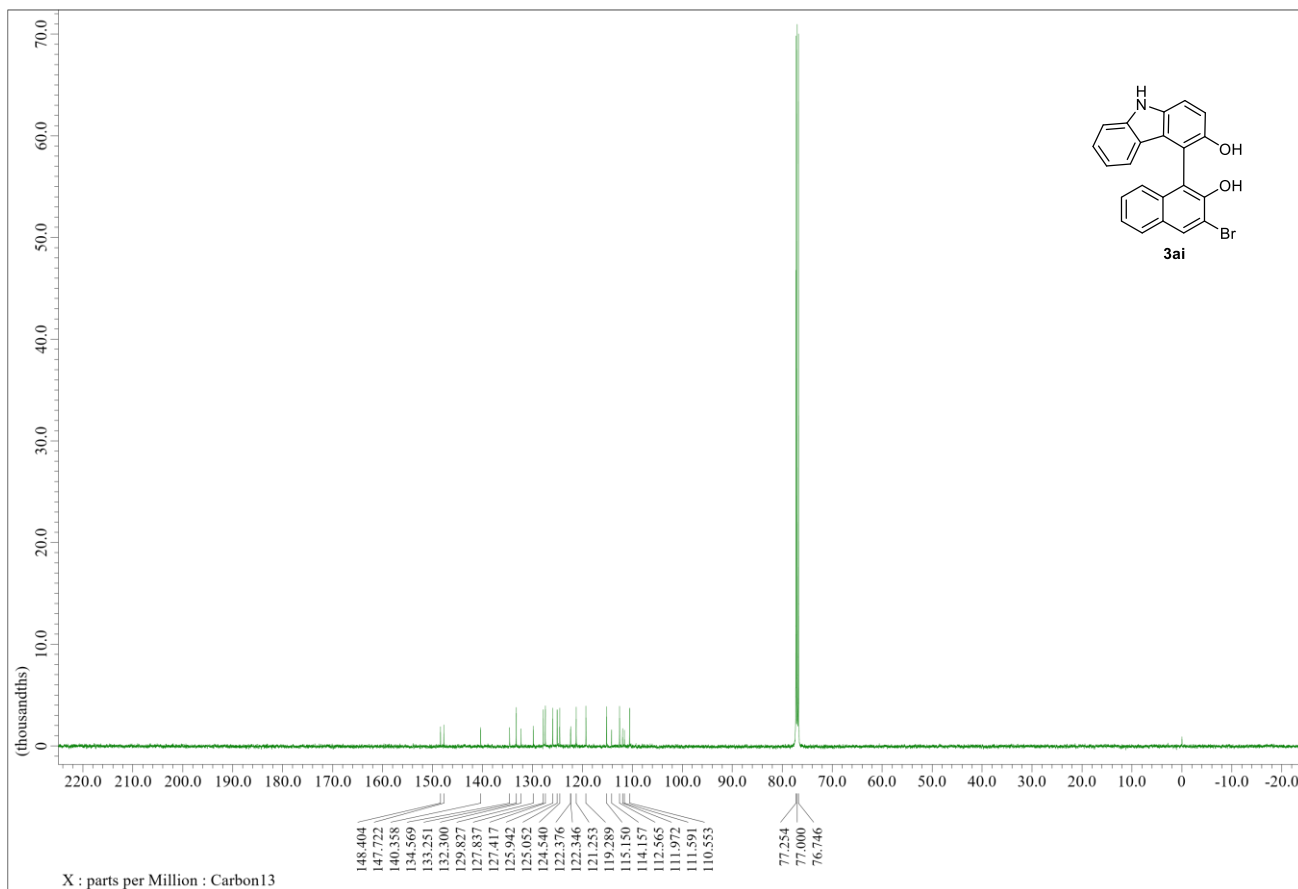

<sup>13</sup>C NMR spectrum (125 MHz, CDCl<sub>3</sub>) of **3ai**

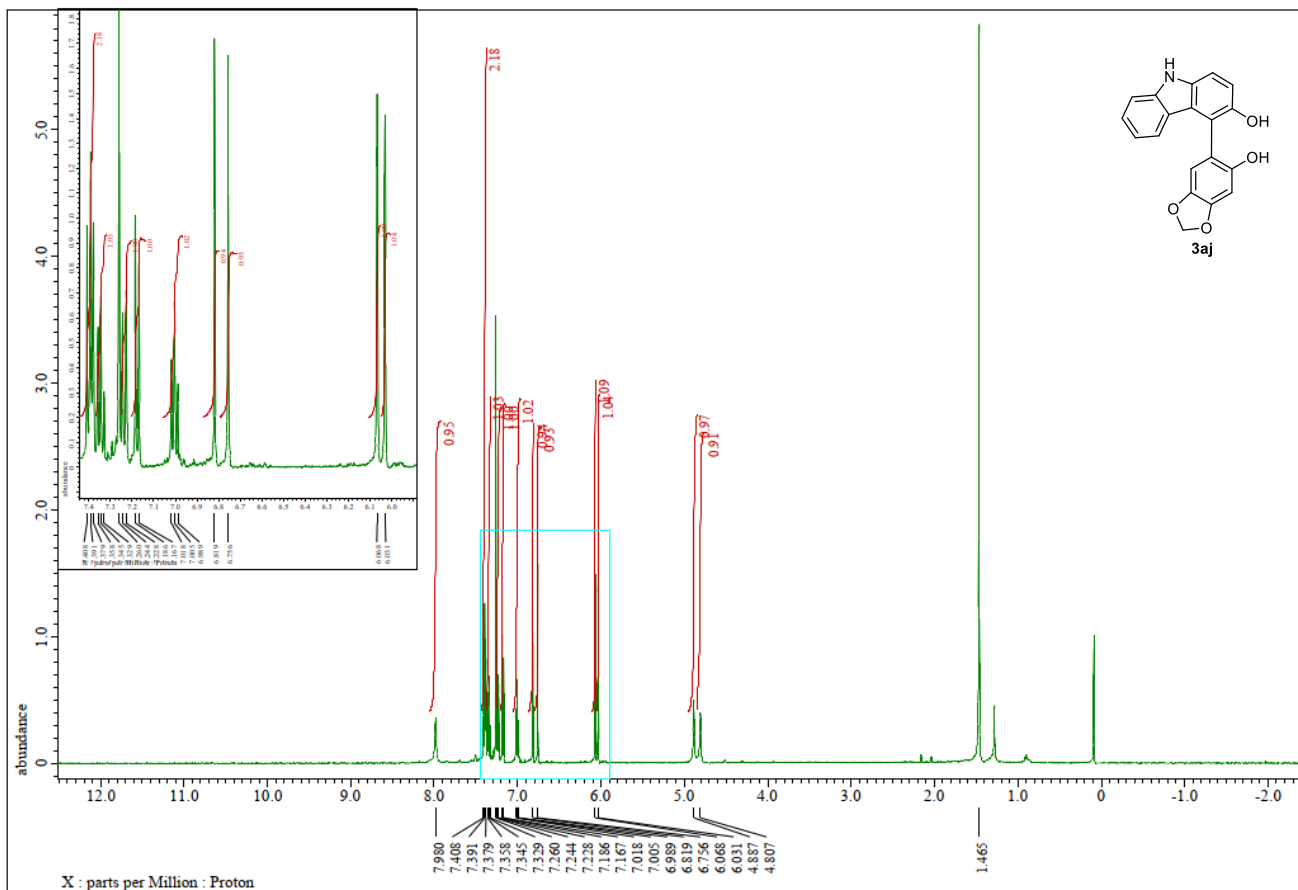

<sup>1</sup>H NMR spectrum (500 MHz, CDCl<sub>3</sub>) of **3aj** at 60°C.

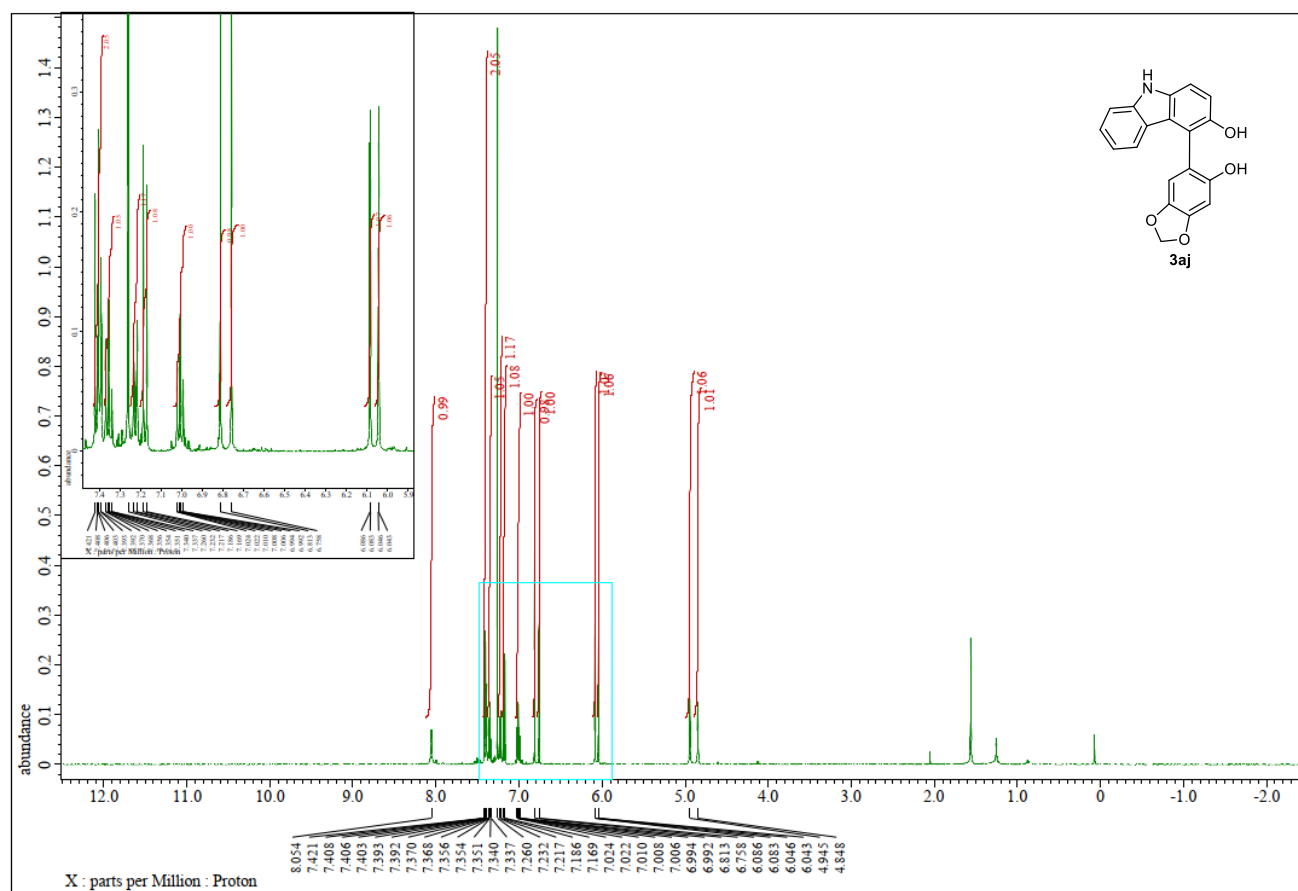

<sup>1</sup>H NMR spectrum (500 MHz, CDCl<sub>3</sub>) of **3aj** at 20°C.

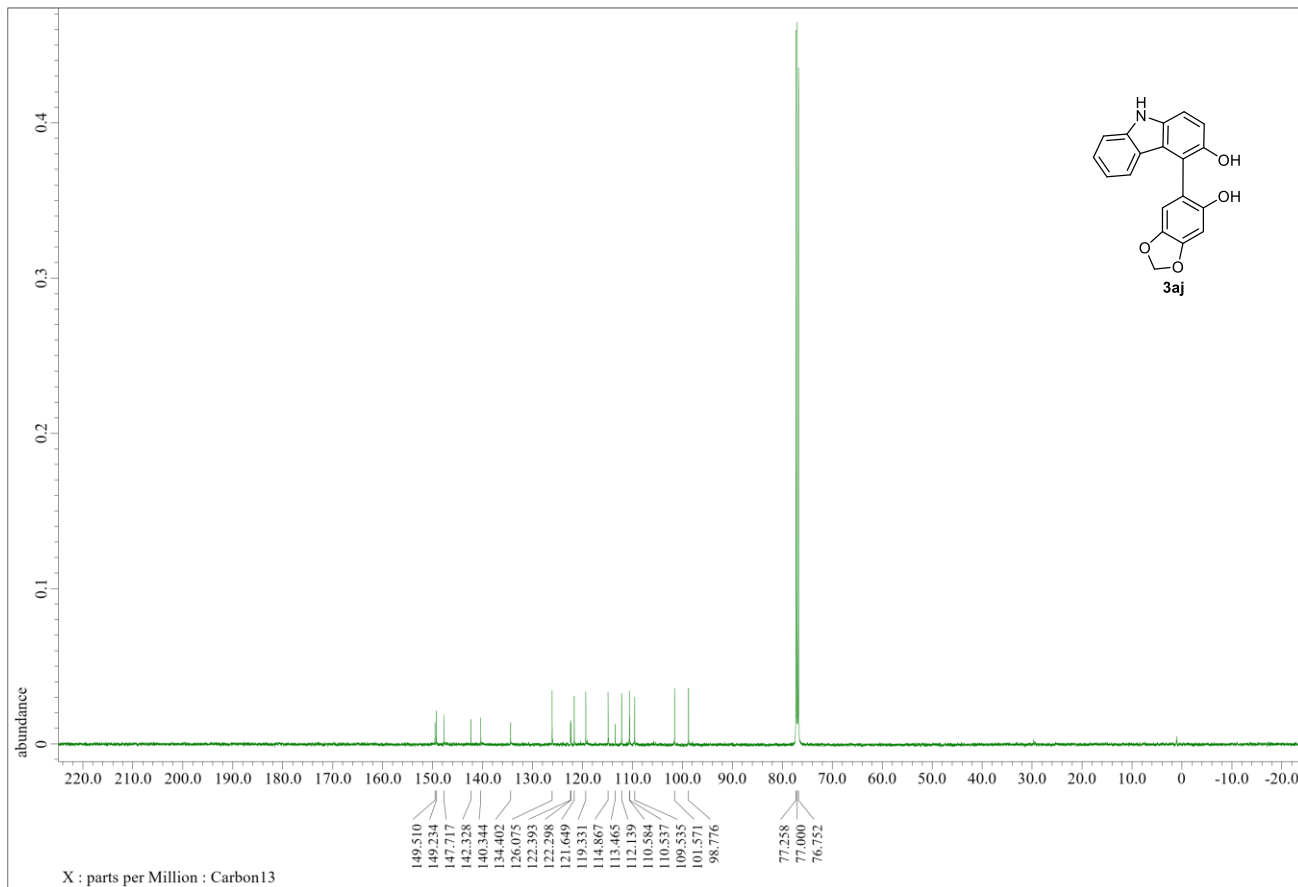

<sup>13</sup>C NMR spectrum (125 MHz, CDCl<sub>3</sub>) of **3aj**

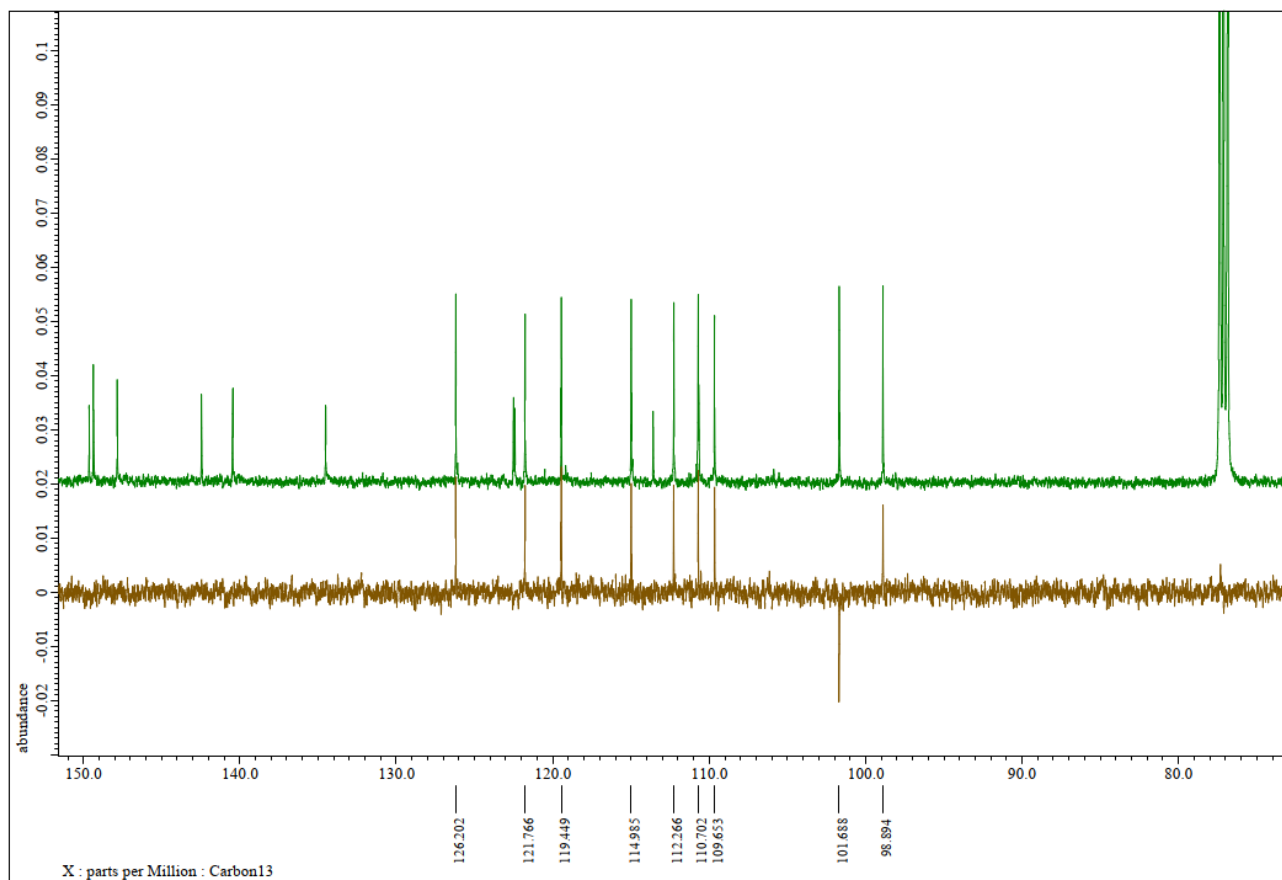

<sup>13</sup>C NMR and DEPT135 spectrum (125 MHz, CDCl<sub>3</sub>) of **3aj**

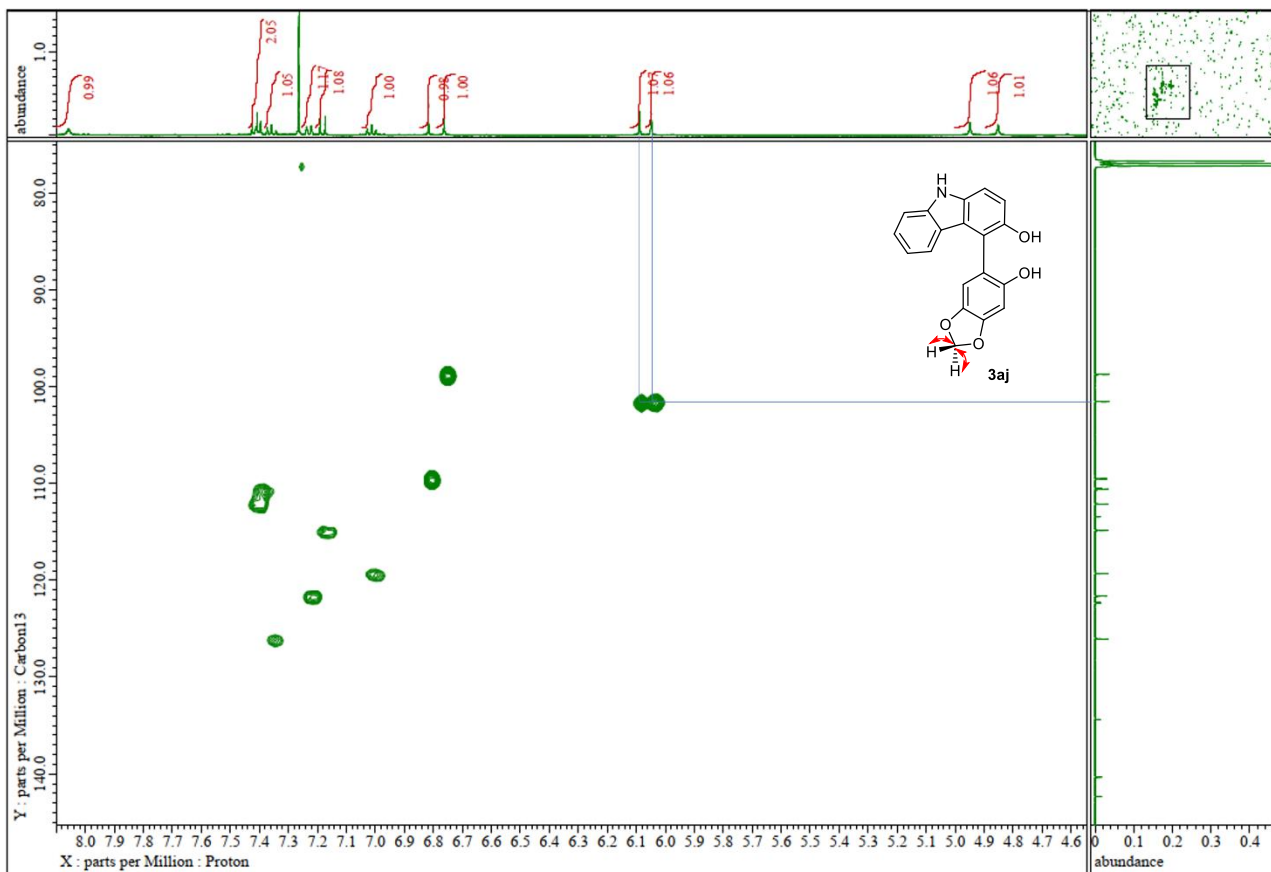

HMQC spectrum (CDCl<sub>3</sub>) of **3aj**

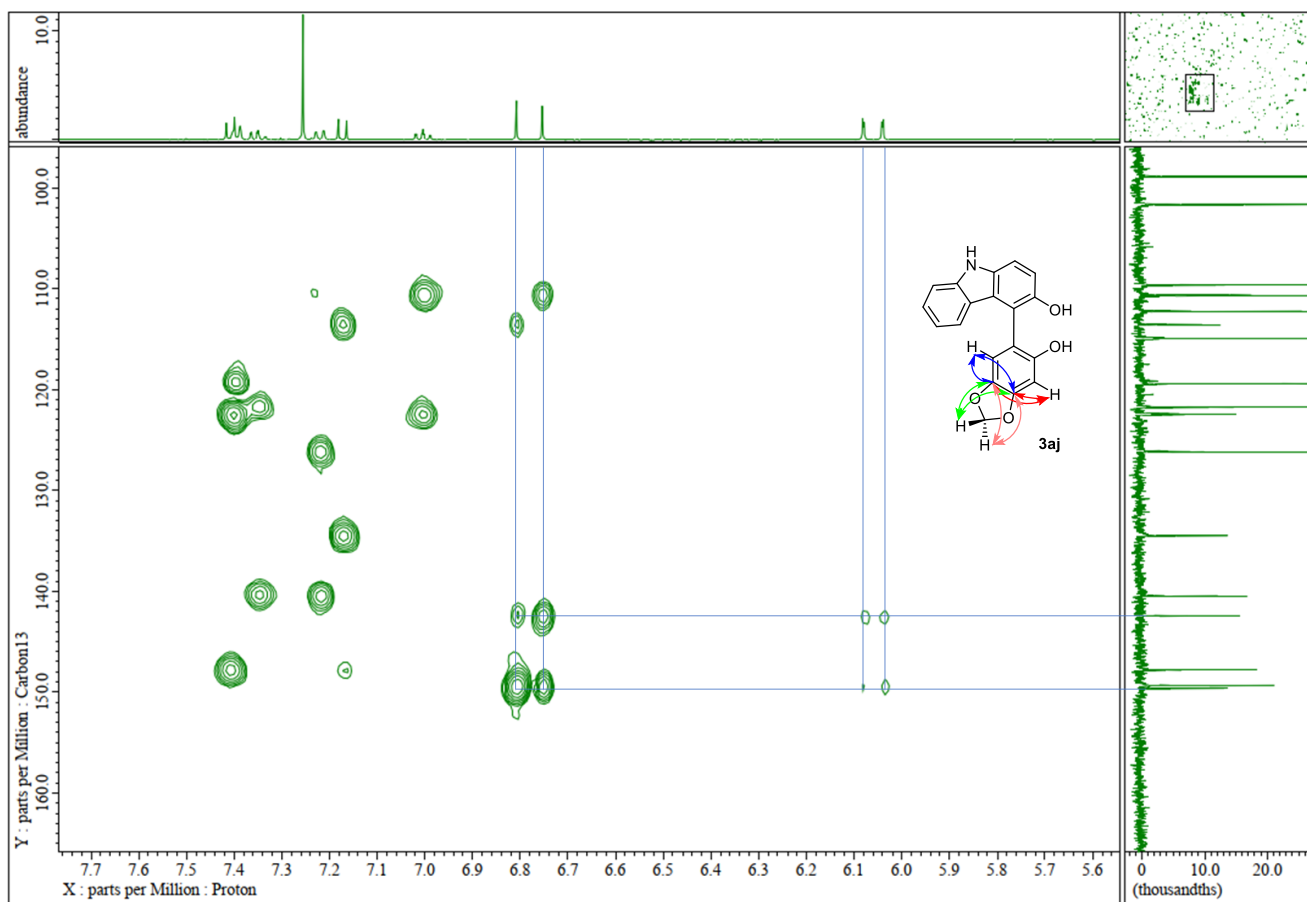

HMBC spectrum (CDCl<sub>3</sub>) of **3aj**

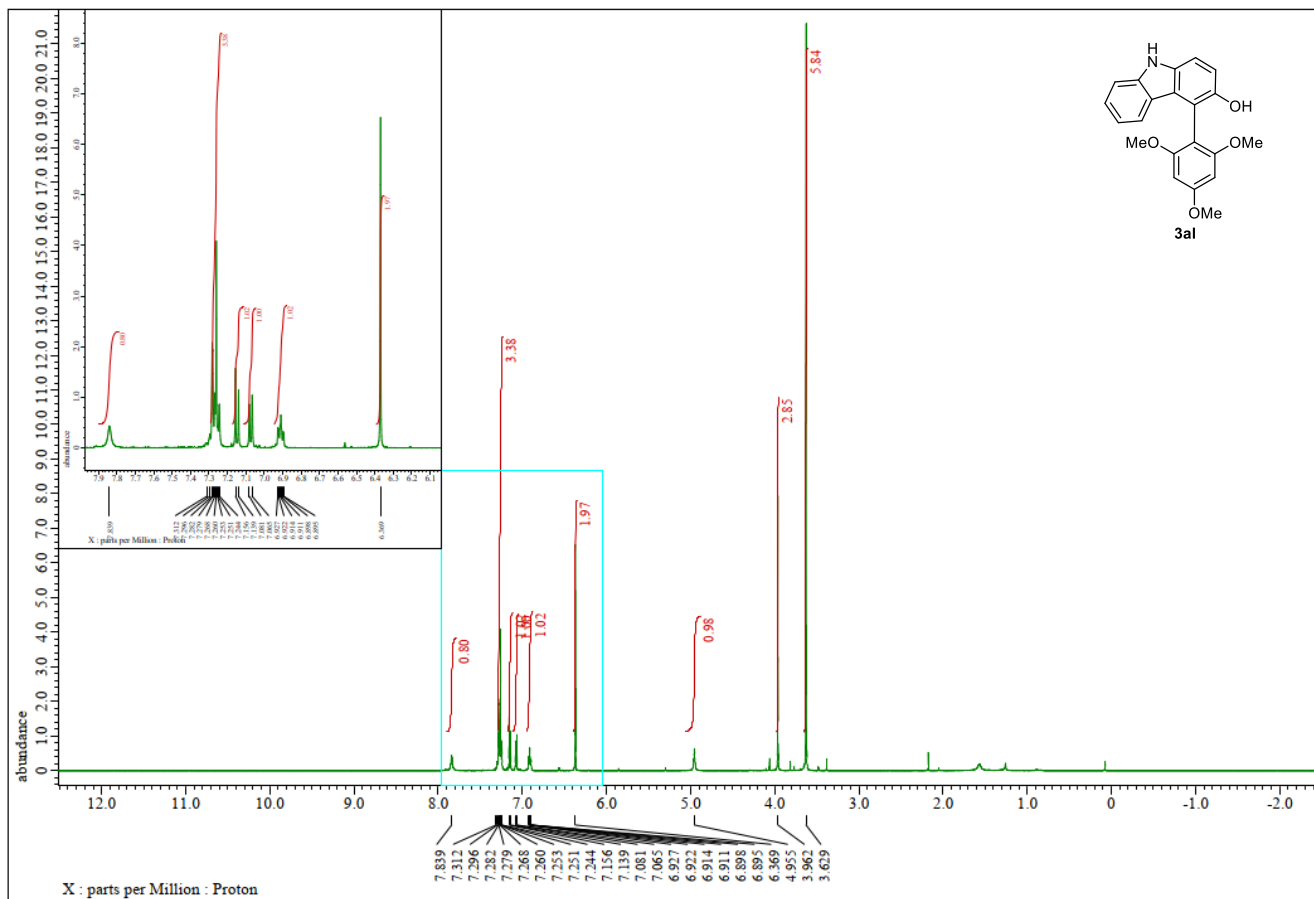

<sup>1</sup>H NMR spectrum (500 MHz, CDCl<sub>3</sub>) of **3aj**

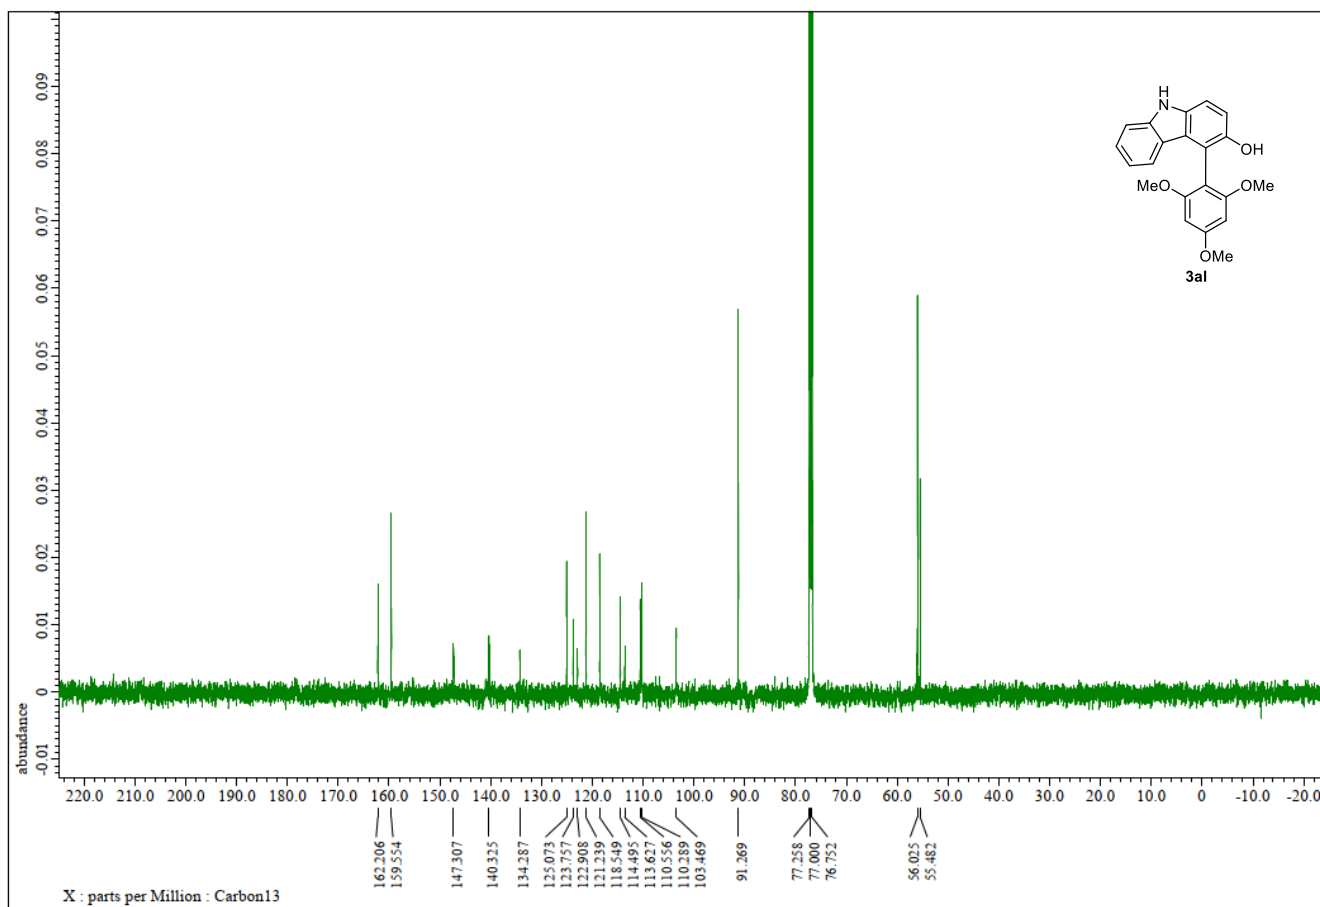

<sup>13</sup>C NMR spectrum (125 MHz, CDCl<sub>3</sub>) of **3aj**
